# Supplementary material for: Human Serum Extracellular Vesicle Proteomic Profile Depends on the Enrichment Method Employed
Source: MDPI journal article supplement (doi:10.3390/ijms222011144), 2021-10-15

**Supplementary Figure S1.** Cryo-electron microscopy of serum samples obtained by the different techniques.

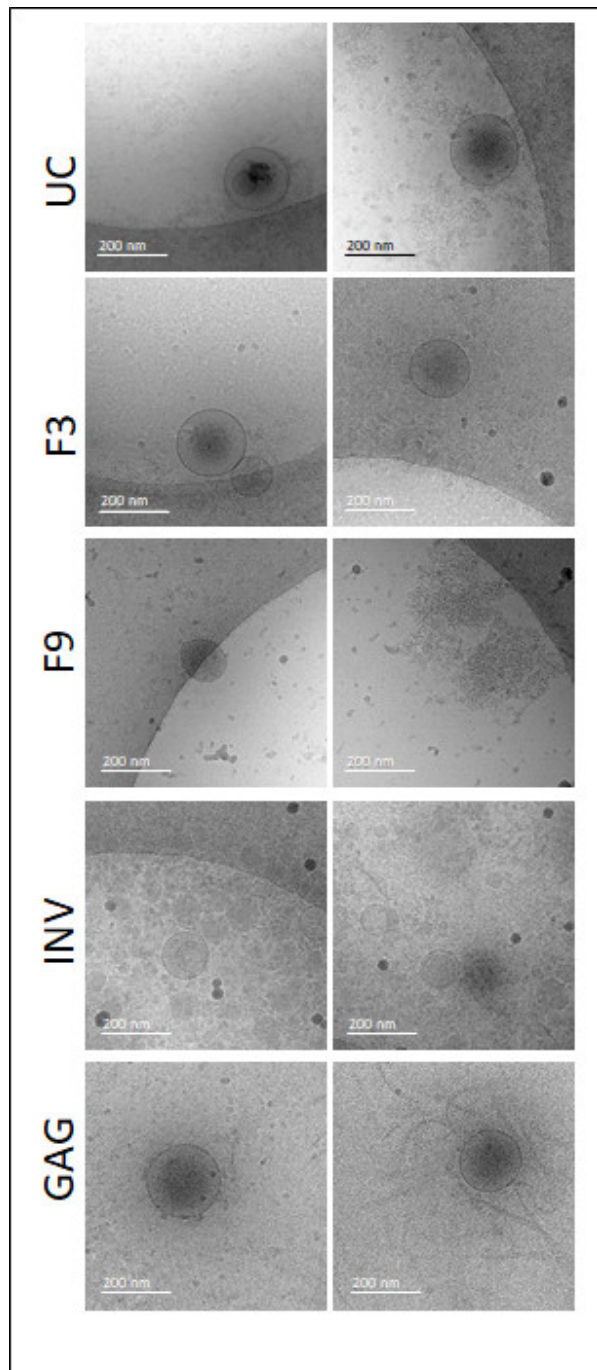

**Supplementary Figure S2.** NTA profiling of the preparations obtained by different techniques, and the concentration obtained.

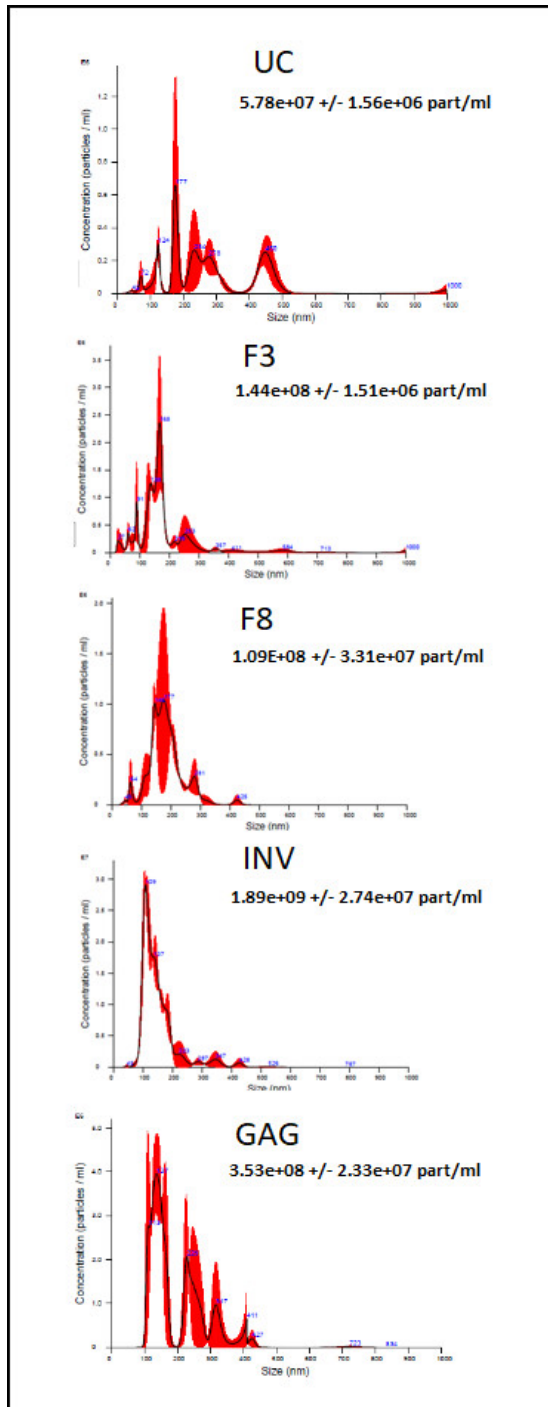

Supplement: s1 [file s1]
