# Supplementary material for: Human Serum Extracellular Vesicle Proteomic Profile Depends on the Enrichment Method Employed
Source: Int J Mol Sci. 2021 Oct 15;22(20):11144. doi: 10.3390/ijms222011144 (PMC8540106; doi:10.3390/ijms222011144)
Supplement: Supplementary file 1 [file ijms-22-11144-s001.zip › Supplemental Table 1.xlsx]

## Sheet: Sheet1
Entry	Description	CARBOHYD Annotation	Peptides	Unique peptides	ANOVA pvalue.adj	T: Significant pairs by Tukey's
P01860	IGHG3_HUMAN Ig gamma-3 chain C region OS=Homo sapiens GN=IGHG3 PE=1 SV=2	Yes	37	19	2.34e-08	GAG_UC;SEC3_UC;INV_UC
P02748	CO9_HUMAN Complement component C9 OS=Homo sapiens GN=C9 PE=1 SV=2	Yes	26	26	2.34e-08	SEC3_UC;INV_UC;GAG_UC;GAG_SEC3;GAG_INV
P02787	TRFE_HUMAN Serotransferrin OS=Homo sapiens GN=TF PE=1 SV=3	Yes	89	87	2.93e-08	GAG_UC;INV_UC;SEC3_UC;SEC3_GAG;SEC3_INV
P01591	IGJ_HUMAN Immunoglobulin J chain OS=Homo sapiens GN=JCHAIN PE=1 SV=4	Yes	16	16	2.93e-08	GAG_UC;SEC3_UC;INV_UC
Q07020	RL18_HUMAN 60S ribosomal protein L18 OS=Homo sapiens GN=RPL18 PE=1 SV=2	No	3	3	3.38e-08	SEC3_GAG;INV_GAG;UC_GAG;INV_SEC3;UC_SEC3
P00747	PLMN_HUMAN Plasminogen OS=Homo sapiens GN=PLG PE=1 SV=2	Yes	43	43	1.41e-07	INV_UC;SEC3_UC;GAG_UC
P02774	VTDB_HUMAN Vitamin D-binding protein OS=Homo sapiens GN=GC PE=1 SV=1	No	44	44	2.08e-07	INV_UC;GAG_UC;SEC3_UC;GAG_INV;SEC3_INV
O43866	CD5L_HUMAN CD5 antigen-like OS=Homo sapiens GN=CD5L PE=1 SV=1	No	24	24	2.34e-07	SEC3_UC;GAG_UC;INV_UC
P00751	CFAB_HUMAN Complement factor B OS=Homo sapiens GN=CFB PE=1 SV=2	Yes	35	35	2.36e-07	INV_UC;GAG_UC;SEC3_UC;SEC3_INV;SEC3_GAG
P09871	C1S_HUMAN Complement C1s subcomponent OS=Homo sapiens GN=C1S PE=1 SV=1	Yes	33	31	2.81e-07	SEC3_UC;INV_UC;GAG_UC;GAG_SEC3;GAG_INV
P48047	ATPO_HUMAN ATP synthase subunit O, mitochondrial OS=Homo sapiens GN=ATP5O PE=1 SV=1	No	2	2	4.78e-07	UC_SEC3;UC_INV;UC_GAG
P0C0L4	CO4A_HUMAN Complement C4-A OS=Homo sapiens GN=C4A PE=1 SV=2	Yes	162	5	7.28e-07	SEC3_UC;INV_UC;GAG_UC;GAG_SEC3;GAG_INV
Q00325	MPCP_HUMAN Phosphate carrier protein, mitochondrial OS=Homo sapiens GN=SLC25A3 PE=1 SV=2	No	5	5	7.28e-07	UC_GAG;UC_SEC3;UC_INV
Q14520	HABP2_HUMAN Hyaluronan-binding protein 2 OS=Homo sapiens GN=HABP2 PE=1 SV=1	Yes	21	21	7.59e-07	INV_UC;GAG_UC;GAG_SEC3;GAG_INV
Q9Y277	VDAC3_HUMAN Voltage-dependent anion-selective channel protein 3 OS=Homo sapiens GN=VDAC3 PE=1 SV=1	No	4	4	8.99e-07	GAG_INV;UC_INV;GAG_SEC3;UC_SEC3
P02652	APOA2_HUMAN Apolipoprotein A-II OS=Homo sapiens GN=APOA2 PE=1 SV=1	No	14	14	9.39e-07	INV_UC;GAG_UC;SEC3_UC;SEC3_INV
P05155	IC1_HUMAN Plasma protease C1 inhibitor OS=Homo sapiens GN=SERPING1 PE=1 SV=2	Yes	23	23	1.16e-06	INV_UC;SEC3_UC;GAG_UC;GAG_INV;GAG_SEC3
P01042	KNG1_HUMAN Kininogen-1 OS=Homo sapiens GN=KNG1 PE=1 SV=2	Yes	31	31	1.16e-06	INV_UC;SEC3_UC;GAG_UC;GAG_INV;GAG_SEC3
P62805	H4_HUMAN Histone H4 OS=Homo sapiens GN=HIST1H4A PE=1 SV=2	No	9	9	1.16e-06	UC_SEC3;UC_INV;UC_GAG
P00738	HPT_HUMAN Haptoglobin OS=Homo sapiens GN=HP PE=1 SV=1	Yes	45	28	1.3e-06	GAG_UC;INV_UC;SEC3_UC;SEC3_GAG;SEC3_INV
Q9UJS0	CMC2_HUMAN Calcium-binding mitochondrial carrier protein Aralar2 OS=Homo sapiens GN=SLC25A13 PE=1 SV=2	No	17	14	1.33e-06	UC_GAG;UC_SEC3;UC_INV
P01024	CO3_HUMAN Complement C3 OS=Homo sapiens GN=C3 PE=1 SV=2	Yes	161	145	1.65e-06	SEC3_UC;INV_UC;GAG_UC
P42765	THIM_HUMAN 3-ketoacyl-CoA thiolase, mitochondrial OS=Homo sapiens GN=ACAA2 PE=1 SV=2	No	4	4	1.9e-06	UC_GAG;UC_INV;UC_SEC3
P62266	RS23_HUMAN 40S ribosomal protein S23 OS=Homo sapiens GN=RPS23 PE=1 SV=3	No	2	2	2.34e-06	UC_GAG;UC_SEC3;UC_INV
P0CG05	LAC2_HUMAN Ig lambda-2 chain C regions OS=Homo sapiens GN=IGLC2 PE=1 SV=1	No	17	4	2.42e-06	INV_UC;GAG_UC;SEC3_UC
P01861	IGHG4_HUMAN Ig gamma-4 chain C region OS=Homo sapiens GN=IGHG4 PE=1 SV=1	Yes	27	17	2.53e-06	SEC3_UC;GAG_UC;INV_UC
P00734	THRB_HUMAN Prothrombin OS=Homo sapiens GN=F2 PE=1 SV=2	Yes	45	45	2.86e-06	SEC3_UC;INV_UC;GAG_UC;GAG_SEC3;GAG_INV
P01834	IGKC_HUMAN Ig kappa chain C region OS=Homo sapiens GN=IGKC PE=1 SV=1	No	17	17	2.86e-06	INV_UC;SEC3_UC;GAG_UC
P46782	RS5_HUMAN 40S ribosomal protein S5 OS=Homo sapiens GN=RPS5 PE=1 SV=4	No	3	3	2.93e-06	INV_GAG;UC_GAG;UC_SEC3;UC_INV
Q02878	RL6_HUMAN 60S ribosomal protein L6 OS=Homo sapiens GN=RPL6 PE=1 SV=3	No	4	4	3.27e-06	UC_GAG;UC_SEC3;UC_INV
Q14624	ITIH4_HUMAN Inter-alpha-trypsin inhibitor heavy chain H4 OS=Homo sapiens GN=ITIH4 PE=1 SV=4	Yes	40	40	3.59e-06	INV_UC;SEC3_UC;GAG_UC
P01859	IGHG2_HUMAN Ig gamma-2 chain C region OS=Homo sapiens GN=IGHG2 PE=1 SV=2	Yes	29	17	3.81e-06	GAG_UC;SEC3_UC;INV_UC
P02790	HEMO_HUMAN Hemopexin OS=Homo sapiens GN=HPX PE=1 SV=2	Yes	22	22	3.81e-06	INV_UC;GAG_UC;SEC3_UC;SEC3_INV
P62917	RL8_HUMAN 60S ribosomal protein L8 OS=Homo sapiens GN=RPL8 PE=1 SV=2	No	4	4	3.81e-06	UC_GAG;UC_SEC3;UC_INV
P02751	FINC_HUMAN Fibronectin OS=Homo sapiens GN=FN1 PE=1 SV=4	Yes	95	93	4.07e-06	SEC3_UC;INV_UC;GAG_UC;GAG_SEC3;GAG_INV
P00450	CERU_HUMAN Ceruloplasmin OS=Homo sapiens GN=CP PE=1 SV=1	Yes	38	38	4.1e-06	INV_UC;SEC3_UC;GAG_UC;SEC3_INV;GAG_INV
P02760	AMBP_HUMAN Protein AMBP OS=Homo sapiens GN=AMBP PE=1 SV=1	Yes	16	16	4.1e-06	INV_UC;SEC3_UC;GAG_UC;GAG_INV;GAG_SEC3
Q14515	SPRL1_HUMAN SPARC-like protein 1 OS=Homo sapiens GN=SPARCL1 PE=1 SV=2	Yes	3	3	4.31e-06	UC_SEC3;GAG_SEC3;GAG_INV;GAG_UC
P62277	RS13_HUMAN 40S ribosomal protein S13 OS=Homo sapiens GN=RPS13 PE=1 SV=2	No	6	6	4.39e-06	UC_GAG;UC_INV;UC_SEC3
P00736	C1R_HUMAN Complement C1r subcomponent OS=Homo sapiens GN=C1R PE=1 SV=2	Yes	44	44	4.59e-06	SEC3_UC;INV_UC;GAG_UC;GAG_SEC3;GAG_INV
Q13103	SPP24_HUMAN Secreted phosphoprotein 24 OS=Homo sapiens GN=SPP2 PE=1 SV=1	No	4	4	4.59e-06	GAG_INV;GAG_SEC3;GAG_UC
P55084	ECHB_HUMAN Trifunctional enzyme subunit beta, mitochondrial OS=Homo sapiens GN=HADHB PE=1 SV=3	No	5	5	4.62e-06	GAG_SEC3;UC_SEC3;GAG_INV;UC_INV
Q969Z3	MARC2_HUMAN Mitochondrial amidoxime reducing component 2 OS=Homo sapiens GN=MARC2 PE=1 SV=1	No	2	2	4.62e-06	INV_GAG;UC_GAG;INV_SEC3;UC_SEC3;UC_INV
P01714	LV301_HUMAN Ig lambda chain V-III region SH OS=Homo sapiens PE=1 SV=1	No	3	3	4.62e-06	GAG_UC;SEC3_UC;INV_UC;INV_GAG
P43652	AFAM_HUMAN Afamin OS=Homo sapiens GN=AFM PE=1 SV=1	Yes	12	12	4.66e-06	UC_INV;GAG_INV;SEC3_INV;GAG_UC;SEC3_UC
Q00266	METK1_HUMAN S-adenosylmethionine synthase isoform type-1 OS=Homo sapiens GN=MAT1A PE=1 SV=2	No	3	3	5.48e-06	UC_SEC3;UC_INV;UC_GAG
P60660	MYL6_HUMAN Myosin light polypeptide 6 OS=Homo sapiens GN=MYL6 PE=1 SV=2	No	5	5	5.98e-06	GAG_SEC3;UC_SEC3;GAG_INV;UC_INV;UC_GAG
P61247	RS3A_HUMAN 40S ribosomal protein S3a OS=Homo sapiens GN=RPS3A PE=1 SV=2	No	9	9	5.98e-06	UC_GAG;UC_INV;UC_SEC3
P68366	TBA4A_HUMAN Tubulin alpha-4A chain OS=Homo sapiens GN=TUBA4A PE=1 SV=1	No	10	3	6.18e-06	UC_GAG;UC_INV;UC_SEC3
P35268	RL22_HUMAN 60S ribosomal protein L22 OS=Homo sapiens GN=RPL22 PE=1 SV=2	No	4	4	6.18e-06	UC_GAG;UC_INV;UC_SEC3
B9A064	IGLL5_HUMAN Immunoglobulin lambda-like polypeptide 5 OS=Homo sapiens GN=IGLL5 PE=2 SV=2;sp	No	14	6	6.18e-06	GAG_UC;INV_UC;SEC3_UC
P00167	CYB5_HUMAN Cytochrome b5 OS=Homo sapiens GN=CYB5A PE=1 SV=2	No	3	3	6.18e-06	GAG_SEC3;UC_SEC3;UC_INV;UC_GAG
P04217	A1BG_HUMAN Alpha-1B-glycoprotein OS=Homo sapiens GN=A1BG PE=1 SV=4	Yes	32	32	6.31e-06	GAG_UC;INV_UC;SEC3_UC;SEC3_GAG;SEC3_INV
P01766	HV305_HUMAN Ig heavy chain V-III region BRO OS=Homo sapiens PE=1 SV=1	No	5	2	6.38e-06	GAG_UC;SEC3_UC;INV_UC
P07225	PROS_HUMAN Vitamin K-dependent protein S OS=Homo sapiens GN=PROS1 PE=1 SV=1	Yes	29	29	6.43e-06	SEC3_UC;INV_UC;GAG_UC;GAG_SEC3;GAG_INV
P62987	RL40_HUMAN Ubiquitin-60S ribosomal protein L40 OS=Homo sapiens GN=UBA52 PE=1 SV=2;sp	No	4	4	6.43e-06	UC_SEC3;UC_GAG;UC_INV
P62750	RL23A_HUMAN 60S ribosomal protein L23a OS=Homo sapiens GN=RPL23A PE=1 SV=1	No	7	7	6.88e-06	UC_GAG;UC_SEC3;UC_INV
P01876	IGHA1_HUMAN Ig alpha-1 chain C region OS=Homo sapiens GN=IGHA1 PE=1 SV=2	Yes	26	9	7.19e-06	GAG_UC;INV_UC;SEC3_UC
P02743	SAMP_HUMAN Serum amyloid P-component OS=Homo sapiens GN=APCS PE=1 SV=2	Yes	10	10	7.39e-06	INV_UC;GAG_UC;INV_SEC3;GAG_SEC3;GAG_INV
P11498	PYC_HUMAN Pyruvate carboxylase, mitochondrial OS=Homo sapiens GN=PC PE=1 SV=2	No	15	14	8.45e-06	GAG_INV;UC_INV;GAG_SEC3;UC_SEC3;UC_GAG
Q99880	H2B1L_HUMAN Histone H2B type 1-L OS=Homo sapiens GN=HIST1H2BL PE=1 SV=3;sp	Yes	6	6	8.82e-06	GAG_INV;UC_INV;UC_SEC3;UC_GAG
P04196	HRG_HUMAN Histidine-rich glycoprotein OS=Homo sapiens GN=HRG PE=1 SV=1	Yes	20	20	8.91e-06	INV_UC;SEC3_UC;GAG_UC;GAG_INV;GAG_SEC3
O75489	NDUS3_HUMAN NADH dehydrogenase [ubiquinone] iron-sulfur protein 3, mitochondrial OS=Homo sapiens GN=NDUFS3 PE=1 SV=1	No	4	4	8.96e-06	UC_SEC3;UC_GAG;UC_INV
P01857	IGHG1_HUMAN Ig gamma-1 chain C region OS=Homo sapiens GN=IGHG1 PE=1 SV=1	Yes	34	19	9.76e-06	INV_UC;SEC3_UC;GAG_UC;GAG_INV
P39019	RS19_HUMAN 40S ribosomal protein S19 OS=Homo sapiens GN=RPS19 PE=1 SV=2	No	4	4	9.84e-06	UC_GAG;UC_SEC3;UC_INV
P06727	APOA4_HUMAN Apolipoprotein A-IV OS=Homo sapiens GN=APOA4 PE=1 SV=3	No	41	41	1e-05	SEC3_UC;GAG_UC;SEC3_INV;GAG_INV
Q16134	ETFD_HUMAN Electron transfer flavoprotein-ubiquinone oxidoreductase, mitochondrial OS=Homo sapiens GN=ETFDH PE=1 SV=2	No	5	5	1e-05	UC_GAG;UC_INV;UC_SEC3
P62829	RL23_HUMAN 60S ribosomal protein L23 OS=Homo sapiens GN=RPL23 PE=1 SV=1	No	5	5	1.01e-05	UC_SEC3;UC_INV;UC_GAG
Q9Y6C9	MTCH2_HUMAN Mitochondrial carrier homolog 2 OS=Homo sapiens GN=MTCH2 PE=1 SV=1	No	4	4	1.13e-05	UC_SEC3;UC_INV;UC_GAG
Q8NE62	CHDH_HUMAN Choline dehydrogenase, mitochondrial OS=Homo sapiens GN=CHDH PE=1 SV=2	No	3	3	1.16e-05	UC_SEC3;UC_INV;UC_GAG
P02765	FETUA_HUMAN Alpha-2-HS-glycoprotein OS=Homo sapiens GN=AHSG PE=1 SV=1	Yes	16	14	1.19e-05	GAG_INV;SEC3_INV;GAG_UC;SEC3_UC
P01623	KV305_HUMAN Ig kappa chain V-III region WOL OS=Homo sapiens PE=1 SV=1	No	8	0	1.19e-05	SEC3_UC;GAG_UC;INV_UC;INV_SEC3
P08559	ODPA_HUMAN Pyruvate dehydrogenase E1 component subunit alpha, somatic form, mitochondrial OS=Homo sapiens GN=PDHA1 PE=1 SV=3;sp	No	2	2	1.19e-05	UC_GAG;UC_INV;UC_SEC3
P04003	C4BPA_HUMAN C4b-binding protein alpha chain OS=Homo sapiens GN=C4BPA PE=1 SV=2	Yes	49	49	1.24e-05	SEC3_UC;INV_UC;GAG_UC;GAG_SEC3;GAG_INV
P14625	ENPL_HUMAN Endoplasmin OS=Homo sapiens GN=HSP90B1 PE=1 SV=1	Yes	15	12	1.24e-05	GAG_INV;UC_INV;GAG_SEC3;UC_SEC3;UC_GAG
P46778	RL21_HUMAN 60S ribosomal protein L21 OS=Homo sapiens GN=RPL21 PE=1 SV=2	No	3	2	1.24e-05	UC_GAG;UC_SEC3;UC_INV
P62851	RS25_HUMAN 40S ribosomal protein S25 OS=Homo sapiens GN=RPS25 PE=1 SV=1	No	6	6	1.38e-05	UC_GAG;UC_INV;UC_SEC3
P01011	AACT_HUMAN Alpha-1-antichymotrypsin OS=Homo sapiens GN=SERPINA3 PE=1 SV=2	Yes	11	11	1.39e-05	SEC3_UC;GAG_UC;SEC3_INV;GAG_INV
P31327	CPSM_HUMAN Carbamoyl-phosphate synthase [ammonia], mitochondrial OS=Homo sapiens GN=CPS1 PE=1 SV=2	Yes	32	29	1.39e-05	UC_GAG;UC_INV;UC_SEC3
P04114	APOB_HUMAN Apolipoprotein B-100 OS=Homo sapiens GN=APOB PE=1 SV=2	Yes	308	305	1.42e-05	GAG_UC;INV_UC;SEC3_UC
Q02543	RL18A_HUMAN 60S ribosomal protein L18a OS=Homo sapiens GN=RPL18A PE=1 SV=2	No	4	4	1.45e-05	UC_GAG;UC_SEC3;UC_INV
P62820	RAB1A_HUMAN Ras-related protein Rab-1A OS=Homo sapiens GN=RAB1A PE=1 SV=3	No	6	2	1.45e-05	UC_SEC3;UC_INV;UC_GAG
P19827	ITIH1_HUMAN Inter-alpha-trypsin inhibitor heavy chain H1 OS=Homo sapiens GN=ITIH1 PE=1 SV=3	Yes	47	47	1.56e-05	INV_UC;SEC3_UC;GAG_UC;GAG_INV;GAG_SEC3
P22307	NLTP_HUMAN Non-specific lipid-transfer protein OS=Homo sapiens GN=SCP2 PE=1 SV=2	No	5	5	1.62e-05	UC_INV;GAG_INV;UC_SEC3;GAG_SEC3
P00966	ASSY_HUMAN Argininosuccinate synthase OS=Homo sapiens GN=ASS1 PE=1 SV=2	No	6	6	1.77e-05	INV_GAG;UC_GAG;UC_SEC3;UC_INV
P16219	ACADS_HUMAN Short-chain specific acyl-CoA dehydrogenase, mitochondrial OS=Homo sapiens GN=ACADS PE=1 SV=1	No	4	4	1.9e-05	UC_GAG;UC_INV;UC_SEC3
P06396	GELS_HUMAN Gelsolin OS=Homo sapiens GN=GSN PE=1 SV=1	No	23	12	2.32e-05	INV_UC;SEC3_UC;GAG_UC;GAG_INV
P04004	VTNC_HUMAN Vitronectin OS=Homo sapiens GN=VTN PE=1 SV=1	Yes	22	18	2.34e-05	SEC3_UC;INV_UC;GAG_UC;GAG_SEC3;GAG_INV
P61313	RL15_HUMAN 60S ribosomal protein L15 OS=Homo sapiens GN=RPL15 PE=1 SV=2	No	2	2	2.35e-05	UC_GAG;UC_SEC3;UC_INV
Q9H936	GHC1_HUMAN Mitochondrial glutamate carrier 1 OS=Homo sapiens GN=SLC25A22 PE=1 SV=1;sp	No	2	2	2.58e-05	UC_SEC3;UC_GAG;UC_INV
P01031	CO5_HUMAN Complement C5 OS=Homo sapiens GN=C5 PE=1 SV=4	Yes	79	79	2.81e-05	SEC3_UC;INV_UC;GAG_UC;GAG_SEC3;GAG_INV
P62241	RS8_HUMAN 40S ribosomal protein S8 OS=Homo sapiens GN=RPS8 PE=1 SV=2	No	8	8	3.04e-05	GAG_SEC3;UC_SEC3;UC_INV;UC_GAG
P02656	APOC3_HUMAN Apolipoprotein C-III OS=Homo sapiens GN=APOC3 PE=1 SV=1	Yes	5	5	3.2e-05	INV_UC;SEC3_UC;GAG_UC
P07333	CSF1R_HUMAN Macrophage colony-stimulating factor 1 receptor OS=Homo sapiens GN=CSF1R PE=1 SV=2	Yes	2	2	3.37e-05	UC_SEC3;GAG_SEC3;GAG_INV;GAG_UC
P0C0L5	CO4B_HUMAN Complement C4-B OS=Homo sapiens GN=C4B PE=1 SV=2	Yes	166	10	3.57e-05	SEC3_UC;INV_UC;GAG_UC;GAG_SEC3;GAG_INV
P55795	HNRH2_HUMAN Heterogeneous nuclear ribonucleoprotein H2 OS=Homo sapiens GN=HNRNPH2 PE=1 SV=1	No	2	1	3.57e-05	UC_GAG;UC_SEC3;UC_INV
P36542	ATPG_HUMAN ATP synthase subunit gamma, mitochondrial OS=Homo sapiens GN=ATP5C1 PE=1 SV=1	No	7	7	3.59e-05	GAG_INV;UC_INV;GAG_SEC3;UC_SEC3
P30613	KPYR_HUMAN Pyruvate kinase PKLR OS=Homo sapiens GN=PKLR PE=1 SV=2	No	3	2	3.68e-05	UC_SEC3;UC_GAG;UC_INV
P46783	RS10_HUMAN 40S ribosomal protein S10 OS=Homo sapiens GN=RPS10 PE=1 SV=1	No	3	3	3.93e-05	UC_GAG;UC_SEC3;UC_INV
O75306	NDUS2_HUMAN NADH dehydrogenase [ubiquinone] iron-sulfur protein 2, mitochondrial OS=Homo sapiens GN=NDUFS2 PE=1 SV=2	No	5	5	3.93e-05	UC_GAG;UC_INV;UC_SEC3
P01767	HV306_HUMAN Ig heavy chain V-III region BUT OS=Homo sapiens PE=1 SV=1	No	3	1	4.03e-05	GAG_UC;INV_UC;SEC3_UC
P23142	FBLN1_HUMAN Fibulin-1 OS=Homo sapiens GN=FBLN1 PE=1 SV=4	Yes	18	18	4.42e-05	SEC3_UC;INV_UC;GAG_UC;GAG_SEC3
P10909	CLUS_HUMAN Clusterin OS=Homo sapiens GN=CLU PE=1 SV=1	Yes	24	24	4.67e-05	SEC3_UC;GAG_UC;SEC3_INV;GAG_INV
P07360	CO8G_HUMAN Complement component C8 gamma chain OS=Homo sapiens GN=C8G PE=1 SV=3	No	8	8	4.67e-05	INV_UC;GAG_UC;GAG_SEC3;GAG_INV
P53007	TXTP_HUMAN Tricarboxylate transport protein, mitochondrial OS=Homo sapiens GN=SLC25A1 PE=1 SV=2	No	6	6	4.67e-05	UC_GAG;UC_INV;UC_SEC3
P80748	LV302_HUMAN Ig lambda chain V-III region LOI OS=Homo sapiens PE=1 SV=1	No	3	3	4.67e-05	GAG_UC;SEC3_UC;INV_UC
P24539	AT5F1_HUMAN ATP synthase F(0) complex subunit B1, mitochondrial OS=Homo sapiens GN=ATP5F1 PE=1 SV=2	No	2	2	4.7e-05	UC_GAG;UC_SEC3;UC_INV
P51884	LUM_HUMAN Lumican OS=Homo sapiens GN=LUM PE=1 SV=2	Yes	13	13	4.85e-05	GAG_UC;GAG_INV;GAG_SEC3
P61978	HNRPK_HUMAN Heterogeneous nuclear ribonucleoprotein K OS=Homo sapiens GN=HNRNPK PE=1 SV=1	No	4	4	4.85e-05	UC_GAG;UC_SEC3;UC_INV
P05026	AT1B1_HUMAN Sodium/potassium-transporting ATPase subunit beta-1 OS=Homo sapiens GN=ATP1B1 PE=1 SV=1	Yes	2	2	4.97e-05	UC_GAG;UC_INV;UC_SEC3
P19823	ITIH2_HUMAN Inter-alpha-trypsin inhibitor heavy chain H2 OS=Homo sapiens GN=ITIH2 PE=1 SV=2	Yes	59	43	5.01e-05	SEC3_UC;INV_UC;GAG_UC;GAG_SEC3;GAG_INV
P01770	HV309_HUMAN Ig heavy chain V-III region NIE OS=Homo sapiens PE=1 SV=1	No	2	1	5.01e-05	INV_UC;SEC3_UC;GAG_UC
P46781	RS9_HUMAN 40S ribosomal protein S9 OS=Homo sapiens GN=RPS9 PE=1 SV=3	No	11	11	5.19e-05	UC_INV;UC_SEC3;UC_GAG
P19404	NDUV2_HUMAN NADH dehydrogenase [ubiquinone] flavoprotein 2, mitochondrial OS=Homo sapiens GN=NDUFV2 PE=1 SV=2	No	3	3	5.23e-05	UC_GAG;UC_SEC3;UC_INV
P42766	RL35_HUMAN 60S ribosomal protein L35 OS=Homo sapiens GN=RPL35 PE=1 SV=2	No	3	3	6.01e-05	UC_GAG;UC_SEC3;UC_INV
P06576	ATPB_HUMAN ATP synthase subunit beta, mitochondrial OS=Homo sapiens GN=ATP5B PE=1 SV=3	Yes	21	20	6.08e-05	UC_GAG;UC_SEC3;UC_INV
P04208	LV106_HUMAN Ig lambda chain V-I region WAH OS=Homo sapiens PE=1 SV=1	No	4	2	6.08e-05	GAG_UC;SEC3_UC;INV_UC;SEC3_GAG;INV_GAG
P25705	ATPA_HUMAN ATP synthase subunit alpha, mitochondrial OS=Homo sapiens GN=ATP5A1 PE=1 SV=1	Yes	26	26	6.3e-05	UC_GAG;UC_SEC3;UC_INV
P02766	TTHY_HUMAN Transthyretin OS=Homo sapiens GN=TTR PE=1 SV=1	Yes	12	12	6.44e-05	SEC3_UC;GAG_UC;GAG_INV
P62854	RS26_HUMAN 40S ribosomal protein S26 OS=Homo sapiens GN=RPS26 PE=1 SV=3;sp	No	3	3	6.47e-05	SEC3_GAG;UC_GAG;UC_INV;UC_SEC3
P50914	RL14_HUMAN 60S ribosomal protein L14 OS=Homo sapiens GN=RPL14 PE=1 SV=4	No	2	2	6.89e-05	UC_GAG;UC_SEC3;UC_INV
P05062	ALDOB_HUMAN Fructose-bisphosphate aldolase B OS=Homo sapiens GN=ALDOB PE=1 SV=2	No	7	7	6.89e-05	UC_GAG;UC_SEC3;UC_INV
Q16610	ECM1_HUMAN Extracellular matrix protein 1 OS=Homo sapiens GN=ECM1 PE=1 SV=2	Yes	7	7	6.95e-05	INV_SEC3;GAG_SEC3;INV_UC;GAG_UC
P36578	RL4_HUMAN 60S ribosomal protein L4 OS=Homo sapiens GN=RPL4 PE=1 SV=5	No	6	6	6.95e-05	SEC3_INV;UC_INV;SEC3_GAG;UC_GAG;UC_SEC3
P23786	CPT2_HUMAN Carnitine O-palmitoyltransferase 2, mitochondrial OS=Homo sapiens GN=CPT2 PE=1 SV=2	No	4	4	6.95e-05	UC_SEC3;UC_GAG;UC_INV
Q08380	LG3BP_HUMAN Galectin-3-binding protein OS=Homo sapiens GN=LGALS3BP PE=1 SV=1	Yes	16	16	7e-05	SEC3_UC;GAG_UC;GAG_INV;GAG_SEC3
P07359	GP1BA_HUMAN Platelet glycoprotein Ib alpha chain OS=Homo sapiens GN=GP1BA PE=1 SV=2	Yes	8	8	7.51e-05	GAG_INV;GAG_SEC3;GAG_UC
P05388	RLA0_HUMAN 60S acidic ribosomal protein P0 OS=Homo sapiens GN=RPLP0 PE=1 SV=1;sp	No	6	6	7.59e-05	UC_INV;UC_SEC3;UC_GAG
P08865	RSSA_HUMAN 40S ribosomal protein SA OS=Homo sapiens GN=RPSA PE=1 SV=4	No	8	8	7.8e-05	UC_SEC3;UC_INV;UC_GAG
Q02978	M2OM_HUMAN Mitochondrial 2-oxoglutarate/malate carrier protein OS=Homo sapiens GN=SLC25A11 PE=1 SV=3	No	4	4	7.8e-05	UC_GAG;UC_INV;UC_SEC3
P01871	IGHM_HUMAN Ig mu chain C region OS=Homo sapiens GN=IGHM PE=1 SV=3	Yes	47	19	7.92e-05	INV_UC;SEC3_UC;GAG_UC
P04040	CATA_HUMAN Catalase OS=Homo sapiens GN=CAT PE=1 SV=3	No	3	3	7.92e-05	UC_INV;UC_SEC3;UC_GAG
P08603	CFAH_HUMAN Complement factor H OS=Homo sapiens GN=CFH PE=1 SV=4	Yes	81	70	8.1e-05	SEC3_UC;INV_UC;GAG_UC
P20674	COX5A_HUMAN Cytochrome c oxidase subunit 5A, mitochondrial OS=Homo sapiens GN=COX5A PE=1 SV=2	No	2	2	8.4e-05	UC_GAG;UC_SEC3;UC_INV
Q9H8H3	MET7A_HUMAN Methyltransferase-like protein 7A OS=Homo sapiens GN=METTL7A PE=1 SV=1	No	2	2	8.43e-05	UC_SEC3;UC_INV;UC_GAG
Q16696	CP2AD_HUMAN Cytochrome P450 2A13 OS=Homo sapiens GN=CYP2A13 PE=1 SV=3;sp	No	5	5	8.54e-05	UC_GAG;UC_SEC3;UC_INV
Q99623	PHB2_HUMAN Prohibitin-2 OS=Homo sapiens GN=PHB2 PE=1 SV=2	No	10	10	8.69e-05	UC_SEC3;UC_INV;UC_GAG
Q15149	PLEC_HUMAN Plectin OS=Homo sapiens GN=PLEC PE=1 SV=3	No	4	4	8.69e-05	UC_SEC3;UC_INV;UC_GAG
P84243	H33_HUMAN Histone H3.3 OS=Homo sapiens GN=H3F3A PE=1 SV=2;sp	No	6	1	8.69e-05	GAG_INV;GAG_SEC3;GAG_UC
P11182	ODB2_HUMAN Lipoamide acyltransferase component of branched-chain alpha-keto acid dehydrogenase complex, mitochondrial OS=Homo sapiens GN=DBT PE=1 SV=3	No	5	5	9.33e-05	UC_GAG;UC_SEC3;UC_INV
P01009	A1AT_HUMAN Alpha-1-antitrypsin OS=Homo sapiens GN=SERPINA1 PE=1 SV=3	Yes	33	33	0.000110009	INV_UC;GAG_UC;SEC3_UC
P02745	C1QA_HUMAN Complement C1q subcomponent subunit A OS=Homo sapiens GN=C1QA PE=1 SV=2	Yes	9	8	0.000110821	SEC3_UC;INV_UC;GAG_UC;GAG_SEC3
P22626	ROA2_HUMAN Heterogeneous nuclear ribonucleoproteins A2/B1 OS=Homo sapiens GN=HNRNPA2B1 PE=1 SV=2	No	5	5	0.000117309	UC_INV;UC_SEC3;UC_GAG
P01593	KV101_HUMAN Ig kappa chain V-I region AG OS=Homo sapiens PE=1 SV=1	No	4	2	0.000119463	GAG_UC;INV_UC;INV_SEC3;INV_GAG
P33121	ACSL1_HUMAN Long-chain-fatty-acid--CoA ligase 1 OS=Homo sapiens GN=ACSL1 PE=1 SV=1	Yes	5	4	0.000120442	UC_INV;UC_SEC3;UC_GAG
Q93088	BHMT1_HUMAN Betaine--homocysteine S-methyltransferase 1 OS=Homo sapiens GN=BHMT PE=1 SV=2	No	4	4	0.000122596	UC_INV;UC_SEC3;UC_GAG
P28331	NDUS1_HUMAN NADH-ubiquinone oxidoreductase 75 kDa subunit, mitochondrial OS=Homo sapiens GN=NDUFS1 PE=1 SV=3	No	15	14	0.000134422	GAG_INV;UC_INV;UC_SEC3;UC_GAG
Q9Y2X3	NOP58_HUMAN Nucleolar protein 58 OS=Homo sapiens GN=NOP58 PE=1 SV=1	No	3	3	0.000135239	UC_GAG;UC_SEC3;UC_INV
P05141	ADT2_HUMAN ADP/ATP translocase 2 OS=Homo sapiens GN=SLC25A5 PE=1 SV=7	No	11	5	0.000135239	UC_INV;UC_SEC3;UC_GAG
P27169	PON1_HUMAN Serum paraoxonase/arylesterase 1 OS=Homo sapiens GN=PON1 PE=1 SV=3	Yes	12	12	0.000136498	SEC3_UC;GAG_UC;SEC3_INV;GAG_INV
P02649	APOE_HUMAN Apolipoprotein E OS=Homo sapiens GN=APOE PE=1 SV=1	Yes	28	28	0.000142558	SEC3_UC;GAG_UC;SEC3_INV;GAG_INV
P15924	DESP_HUMAN Desmoplakin OS=Homo sapiens GN=DSP PE=1 SV=3	No	6	6	0.000152019	UC_INV;UC_GAG;UC_SEC3
P62263	RS14_HUMAN 40S ribosomal protein S14 OS=Homo sapiens GN=RPS14 PE=1 SV=3	No	7	7	0.000152019	UC_INV;UC_SEC3;UC_GAG
P02675	FIBB_HUMAN Fibrinogen beta chain OS=Homo sapiens GN=FGB PE=1 SV=2	Yes	2	2	0.000152509	UC_SEC3;UC_GAG;UC_INV
O75891	AL1L1_HUMAN Cytosolic 10-formyltetrahydrofolate dehydrogenase OS=Homo sapiens GN=ALDH1L1 PE=1 SV=2	No	9	8	0.000154023	UC_SEC3;UC_GAG;UC_INV
P05091	ALDH2_HUMAN Aldehyde dehydrogenase, mitochondrial OS=Homo sapiens GN=ALDH2 PE=1 SV=2	No	9	7	0.000155877	UC_GAG;UC_SEC3;UC_INV
Q16706	MA2A1_HUMAN Alpha-mannosidase 2 OS=Homo sapiens GN=MAN2A1 PE=1 SV=2	Yes	3	3	0.000156199	UC_GAG;UC_INV;UC_SEC3
P20851	C4BPB_HUMAN C4b-binding protein beta chain OS=Homo sapiens GN=C4BPB PE=1 SV=1	Yes	12	12	0.000162073	GAG_UC;GAG_SEC3;GAG_INV
Q8N766	EMC1_HUMAN ER membrane protein complex subunit 1 OS=Homo sapiens GN=EMC1 PE=1 SV=1	Yes	2	2	0.00016314	UC_GAG;UC_SEC3;UC_INV
P54868	HMCS2_HUMAN Hydroxymethylglutaryl-CoA synthase, mitochondrial OS=Homo sapiens GN=HMGCS2 PE=1 SV=1	No	3	3	0.000172871	UC_GAG;UC_INV;UC_SEC3
P19338	NUCL_HUMAN Nucleolin OS=Homo sapiens GN=NCL PE=1 SV=3	No	4	4	0.000172871	UC_GAG;UC_INV;UC_SEC3
Q9UGP8	SEC63_HUMAN Translocation protein SEC63 homolog OS=Homo sapiens GN=SEC63 PE=1 SV=2	No	4	4	0.00017419	UC_GAG;UC_INV;UC_SEC3
P01008	ANT3_HUMAN Antithrombin-III OS=Homo sapiens GN=SERPINC1 PE=1 SV=1	Yes	23	23	0.000174606	SEC3_UC;GAG_UC;SEC3_INV;GAG_INV
Q9Y3U8	RL36_HUMAN 60S ribosomal protein L36 OS=Homo sapiens GN=RPL36 PE=1 SV=3	No	3	2	0.000179665	UC_GAG;UC_SEC3;UC_INV
P62249	RS16_HUMAN 40S ribosomal protein S16 OS=Homo sapiens GN=RPS16 PE=1 SV=2	No	8	8	0.000181817	UC_INV;UC_GAG;UC_SEC3
P13667	PDIA4_HUMAN Protein disulfide-isomerase A4 OS=Homo sapiens GN=PDIA4 PE=1 SV=2	No	2	2	0.000188291	UC_INV;GAG_INV;UC_SEC3;GAG_SEC3
P04433	KV309_HUMAN Ig kappa chain V-III region VG (Fragment) OS=Homo sapiens PE=1 SV=1	No	4	4	0.000197302	GAG_UC;SEC3_UC;INV_UC;INV_GAG
P02647	APOA1_HUMAN Apolipoprotein A-I OS=Homo sapiens GN=APOA1 PE=1 SV=1	Yes	55	54	0.000209325	INV_UC;GAG_UC;SEC3_UC;GAG_INV;SEC3_INV
P02749	APOH_HUMAN Beta-2-glycoprotein 1 OS=Homo sapiens GN=APOH PE=1 SV=3	Yes	22	22	0.000209325	GAG_UC;SEC3_UC;INV_UC;INV_GAG;INV_SEC3
Q14204	DYHC1_HUMAN Cytoplasmic dynein 1 heavy chain 1 OS=Homo sapiens GN=DYNC1H1 PE=1 SV=5	No	3	3	0.000218529	UC_GAG;UC_INV;UC_SEC3
Q13790	APOF_HUMAN Apolipoprotein F OS=Homo sapiens GN=APOF PE=1 SV=2	Yes	3	3	0.000221335	GAG_UC;SEC3_UC;GAG_INV;SEC3_INV
P62906	RL10A_HUMAN 60S ribosomal protein L10a OS=Homo sapiens GN=RPL10A PE=1 SV=2	No	5	5	0.000221335	INV_SEC3;UC_SEC3;UC_GAG;UC_INV
P62888	RL30_HUMAN 60S ribosomal protein L30 OS=Homo sapiens GN=RPL30 PE=1 SV=2	No	5	4	0.000221647	UC_SEC3;UC_INV;UC_GAG
Q03591	FHR1_HUMAN Complement factor H-related protein 1 OS=Homo sapiens GN=CFHR1 PE=1 SV=2	Yes	13	3	0.000230504	INV_UC;GAG_UC;INV_SEC3;GAG_SEC3
P02747	C1QC_HUMAN Complement C1q subcomponent subunit C OS=Homo sapiens GN=C1QC PE=1 SV=3	Yes	8	8	0.000241741	SEC3_UC;INV_UC;GAG_UC;GAG_SEC3
P02655	APOC2_HUMAN Apolipoprotein C-II OS=Homo sapiens GN=APOC2 PE=1 SV=1	No	6	6	0.000245332	GAG_INV;SEC3_INV;GAG_UC;SEC3_UC
Q14766	LTBP1_HUMAN Latent-transforming growth factor beta-binding protein 1 OS=Homo sapiens GN=LTBP1 PE=1 SV=4	Yes	3	3	0.000257985	GAG_SEC3;GAG_UC;GAG_INV
P68104	EF1A1_HUMAN Elongation factor 1-alpha 1 OS=Homo sapiens GN=EEF1A1 PE=1 SV=1;sp	No	13	13	0.000274276	UC_SEC3;UC_GAG;UC_INV
P08519	APOA_HUMAN Apolipoprotein(a) OS=Homo sapiens GN=LPA PE=1 SV=1	Yes	32	32	0.000277904	GAG_UC;SEC3_UC;INV_UC;INV_GAG
P08185	CBG_HUMAN Corticosteroid-binding globulin OS=Homo sapiens GN=SERPINA6 PE=1 SV=1	Yes	2	2	0.000278975	GAG_INV;SEC3_INV;GAG_UC;SEC3_UC
O95445	APOM_HUMAN Apolipoprotein M OS=Homo sapiens GN=APOM PE=1 SV=2	Yes	8	8	0.000314425	INV_GAG;SEC3_GAG;INV_UC;SEC3_UC
Q5IS80	A4_PANTR Amyloid beta A4 protein OS=Pan troglodytes GN=APP PE=2 SV=1;sp	Yes	2	2	0.000314425	GAG_SEC3;GAG_INV;GAG_UC
P62424	RL7A_HUMAN 60S ribosomal protein L7a OS=Homo sapiens GN=RPL7A PE=1 SV=2	No	8	8	0.000320995	UC_INV;UC_SEC3;UC_GAG
Q00341	VIGLN_HUMAN Vigilin OS=Homo sapiens GN=HDLBP PE=1 SV=2	No	6	6	0.000324139	UC_INV;UC_GAG;UC_SEC3
Q9P2E9	RRBP1_HUMAN Ribosome-binding protein 1 OS=Homo sapiens GN=RRBP1 PE=1 SV=4	No	5	5	0.000334146	UC_SEC3;UC_INV;UC_GAG
P07357	CO8A_HUMAN Complement component C8 alpha chain OS=Homo sapiens GN=C8A PE=1 SV=2	Yes	22	21	0.000338574	SEC3_UC;INV_UC;GAG_UC;GAG_SEC3;GAG_INV
P10412	H14_HUMAN Histone H1.4 OS=Homo sapiens GN=HIST1H1E PE=1 SV=2;sp	No	8	1	0.000341882	UC_SEC3;UC_GAG;UC_INV
Q7Z7H5	TMED4_HUMAN Transmembrane emp24 domain-containing protein 4 OS=Homo sapiens GN=TMED4 PE=1 SV=1	Yes	2	1	0.000358246	UC_GAG;UC_INV;UC_SEC3
P51648	AL3A2_HUMAN Fatty aldehyde dehydrogenase OS=Homo sapiens GN=ALDH3A2 PE=1 SV=1	No	3	3	0.000377847	UC_GAG;UC_SEC3;UC_INV
O75882	ATRN_HUMAN Attractin OS=Homo sapiens GN=ATRN PE=1 SV=2	Yes	4	4	0.000387109	SEC3_INV;GAG_INV;UC_INV
P62701	RS4X_HUMAN 40S ribosomal protein S4, X isoform OS=Homo sapiens GN=RPS4X PE=1 SV=2	No	10	9	0.000387109	UC_INV;UC_SEC3;UC_GAG
P55072	TERA_HUMAN Transitional endoplasmic reticulum ATPase OS=Homo sapiens GN=VCP PE=1 SV=4	No	5	5	0.000395238	UC_GAG;UC_SEC3;UC_INV
Q5VTU8	AT5EL_HUMAN ATP synthase subunit epsilon-like protein, mitochondrial OS=Homo sapiens GN=ATP5EP2 PE=3 SV=1;sp	No	2	2	0.000399054	UC_SEC3;UC_INV;UC_GAG
O94905	ERLN2_HUMAN Erlin-2 OS=Homo sapiens GN=ERLIN2 PE=1 SV=1;sp	Yes	2	2	0.000404503	UC_SEC3;UC_GAG;UC_INV
P07358	CO8B_HUMAN Complement component C8 beta chain OS=Homo sapiens GN=C8B PE=1 SV=3	Yes	21	21	0.000404503	INV_UC;GAG_UC;GAG_SEC3;GAG_INV
P11142	HSP7C_HUMAN Heat shock cognate 71 kDa protein OS=Homo sapiens GN=HSPA8 PE=1 SV=1;sp	No	10	7	0.000404503	UC_INV;UC_GAG;UC_SEC3
P49207	RL34_HUMAN 60S ribosomal protein L34 OS=Homo sapiens GN=RPL34 PE=1 SV=3	No	2	2	0.00041425	UC_INV;UC_GAG;UC_SEC3
P84098	RL19_HUMAN 60S ribosomal protein L19 OS=Homo sapiens GN=RPL19 PE=1 SV=1	No	2	2	0.000415223	UC_GAG;UC_SEC3;UC_INV
Q06033	ITIH3_HUMAN Inter-alpha-trypsin inhibitor heavy chain H3 OS=Homo sapiens GN=ITIH3 PE=1 SV=2	Yes	29	29	0.000418963	GAG_UC;GAG_INV;GAG_SEC3
O75027	ABCB7_HUMAN ATP-binding cassette sub-family B member 7, mitochondrial OS=Homo sapiens GN=ABCB7 PE=1 SV=2	No	3	3	0.000429931	UC_GAG;UC_SEC3;UC_INV
P03952	KLKB1_HUMAN Plasma kallikrein OS=Homo sapiens GN=KLKB1 PE=1 SV=1	Yes	16	16	0.000500577	INV_UC;GAG_UC;SEC3_UC
P04275	VWF_HUMAN von Willebrand factor OS=Homo sapiens GN=VWF PE=1 SV=4	Yes	67	66	0.000511596	SEC3_UC;GAG_UC;GAG_INV
P0CG06	LAC3_HUMAN Ig lambda-3 chain C regions OS=Homo sapiens GN=IGLC3 PE=1 SV=1	No	12	1	0.000514111	INV_GAG;INV_SEC3;INV_UC
P47755	CAZA2_HUMAN F-actin-capping protein subunit alpha-2 OS=Homo sapiens GN=CAPZA2 PE=1 SV=3;sp	No	2	2	0.000514111	UC_GAG;UC_INV;UC_SEC3
P50990	TCPQ_HUMAN T-complex protein 1 subunit theta OS=Homo sapiens GN=CCT8 PE=1 SV=4	No	4	4	0.000542556	UC_GAG;UC_INV;UC_SEC3
O95831	AIFM1_HUMAN Apoptosis-inducing factor 1, mitochondrial OS=Homo sapiens GN=AIFM1 PE=1 SV=1	No	6	5	0.000546665	UC_SEC3;UC_INV;UC_GAG
P30050	RL12_HUMAN 60S ribosomal protein L12 OS=Homo sapiens GN=RPL12 PE=1 SV=1	No	5	5	0.000579664	UC_SEC3;UC_INV;UC_GAG
P23284	PPIB_HUMAN Peptidyl-prolyl cis-trans isomerase B OS=Homo sapiens GN=PPIB PE=1 SV=2	Yes	4	4	0.000593792	UC_GAG;UC_SEC3;UC_INV
O14791	APOL1_HUMAN Apolipoprotein L1 OS=Homo sapiens GN=APOL1 PE=1 SV=5	Yes	10	10	0.000598482	INV_UC;SEC3_UC;GAG_UC
P02679	FIBG_HUMAN Fibrinogen gamma chain OS=Homo sapiens GN=FGG PE=1 SV=3	Yes	3	3	0.00063457	GAG_INV;GAG_SEC3;GAG_UC
O94826	TOM70_HUMAN Mitochondrial import receptor subunit TOM70 OS=Homo sapiens GN=TOMM70 PE=1 SV=1	No	4	4	0.000653877	UC_GAG;UC_SEC3;UC_INV
P13591	NCAM1_HUMAN Neural cell adhesion molecule 1 OS=Homo sapiens GN=NCAM1 PE=1 SV=3	Yes	6	6	0.000659967	UC_SEC3;GAG_SEC3;GAG_INV
P12259	FA5_HUMAN Coagulation factor V OS=Homo sapiens GN=F5 PE=1 SV=4	Yes	21	18	0.000670137	GAG_INV;GAG_UC;GAG_SEC3
O00217	NDUS8_HUMAN NADH dehydrogenase [ubiquinone] iron-sulfur protein 8, mitochondrial OS=Homo sapiens GN=NDUFS8 PE=1 SV=1	No	2	2	0.000670137	UC_GAG;UC_SEC3;UC_INV
P05546	HEP2_HUMAN Heparin cofactor 2 OS=Homo sapiens GN=SERPIND1 PE=1 SV=3	Yes	16	16	0.000671112	SEC3_UC;GAG_UC;GAG_INV
P05023	AT1A1_HUMAN Sodium/potassium-transporting ATPase subunit alpha-1 OS=Homo sapiens GN=ATP1A1 PE=1 SV=1;sp	No	17	16	0.000671112	UC_SEC3;UC_INV;UC_GAG
P08238	HS90B_HUMAN Heat shock protein HSP 90-beta OS=Homo sapiens GN=HSP90AB1 PE=1 SV=4	Yes	12	5	0.000691525	GAG_SEC3;UC_SEC3;GAG_INV;UC_INV
P01781	HV320_HUMAN Ig heavy chain V-III region GAL OS=Homo sapiens PE=1 SV=1	No	4	3	0.000694273	SEC3_GAG;INV_GAG;INV_UC
P53621	COPA_HUMAN Coatomer subunit alpha OS=Homo sapiens GN=COPA PE=1 SV=2	No	6	6	0.000704342	UC_INV;UC_SEC3;UC_GAG
Q00839	HNRPU_HUMAN Heterogeneous nuclear ribonucleoprotein U OS=Homo sapiens GN=HNRNPU PE=1 SV=6	No	6	6	0.000719458	UC_SEC3;UC_GAG;UC_INV
P61803	DAD1_HUMAN Dolichyl-diphosphooligosaccharide--protein glycosyltransferase subunit DAD1 OS=Homo sapiens GN=DAD1 PE=1 SV=3	No	2	2	0.000725013	UC_SEC3;UC_INV;UC_GAG
O43795	MYO1B_HUMAN Unconventional myosin-Ib OS=Homo sapiens GN=MYO1B PE=1 SV=3;sp	No	4	4	0.000817927	INV_GAG;UC_GAG;UC_SEC3;UC_INV
P26373	RL13_HUMAN 60S ribosomal protein L13 OS=Homo sapiens GN=RPL13 PE=1 SV=4	No	4	4	0.000862123	UC_INV;UC_GAG;UC_SEC3
P38646	GRP75_HUMAN Stress-70 protein, mitochondrial OS=Homo sapiens GN=HSPA9 PE=1 SV=2	No	11	11	0.000862123	GAG_SEC3;UC_SEC3;UC_INV
Q02252	MMSA_HUMAN Methylmalonate-semialdehyde dehydrogenase [acylating], mitochondrial OS=Homo sapiens GN=ALDH6A1 PE=1 SV=2	No	4	3	0.000869512	GAG_SEC3;UC_SEC3;GAG_INV;UC_INV
P26640	SYVC_HUMAN Valine--tRNA ligase OS=Homo sapiens GN=VARS PE=1 SV=4	No	2	1	0.000931365	UC_GAG;UC_INV;UC_SEC3
P01617	KV204_HUMAN Ig kappa chain V-II region TEW OS=Homo sapiens PE=1 SV=1	No	3	1	0.000950871	INV_UC;SEC3_UC;SEC3_GAG
P08574	CY1_HUMAN Cytochrome c1, heme protein, mitochondrial OS=Homo sapiens GN=CYC1 PE=1 SV=3	No	3	3	0.00100467	GAG_INV;UC_INV;GAG_SEC3;UC_SEC3
P63173	RL38_HUMAN 60S ribosomal protein L38 OS=Homo sapiens GN=RPL38 PE=1 SV=2	No	4	4	0.00100935	UC_SEC3;UC_INV;UC_GAG
P39656	OST48_HUMAN Dolichyl-diphosphooligosaccharide--protein glycosyltransferase 48 kDa subunit OS=Homo sapiens GN=DDOST PE=1 SV=4	No	7	7	0.00103231	SEC3_INV;UC_INV;UC_GAG;UC_SEC3
Q969X5	ERGI1_HUMAN Endoplasmic reticulum-Golgi intermediate compartment protein 1 OS=Homo sapiens GN=ERGIC1 PE=1 SV=1	Yes	3	3	0.00103642	UC_INV;UC_SEC3;UC_GAG
P04844	RPN2_HUMAN Dolichyl-diphosphooligosaccharide--protein glycosyltransferase subunit 2 OS=Homo sapiens GN=RPN2 PE=1 SV=3	Yes	4	4	0.00103744	UC_GAG;UC_INV;UC_SEC3
Q15005	SPCS2_HUMAN Signal peptidase complex subunit 2 OS=Homo sapiens GN=SPCS2 PE=1 SV=3	No	2	2	0.00103744	UC_GAG;UC_INV;UC_SEC3
Q99714	HCD2_HUMAN 3-hydroxyacyl-CoA dehydrogenase type-2 OS=Homo sapiens GN=HSD17B10 PE=1 SV=3	No	2	2	0.00104259	SEC3_GAG;SEC3_INV;SEC3_UC
P05156	CFAI_HUMAN Complement factor I OS=Homo sapiens GN=CFI PE=1 SV=2	Yes	23	23	0.00107342	INV_UC;INV_GAG;INV_SEC3
Q96AG4	LRC59_HUMAN Leucine-rich repeat-containing protein 59 OS=Homo sapiens GN=LRRC59 PE=1 SV=1	No	2	2	0.00107342	UC_GAG;UC_INV;UC_SEC3
P26641	EF1G_HUMAN Elongation factor 1-gamma OS=Homo sapiens GN=EEF1G PE=1 SV=3	No	3	3	0.00107342	UC_GAG;UC_SEC3;UC_INV
Q06830	PRDX1_HUMAN Peroxiredoxin-1 OS=Homo sapiens GN=PRDX1 PE=1 SV=1	No	5	4	0.00107361	UC_GAG;UC_SEC3;UC_INV
P14618	KPYM_HUMAN Pyruvate kinase PKM OS=Homo sapiens GN=PKM PE=1 SV=4	No	3	2	0.00107361	GAG_SEC3;GAG_INV;GAG_UC
Q15006	EMC2_HUMAN ER membrane protein complex subunit 2 OS=Homo sapiens GN=EMC2 PE=1 SV=1	No	2	2	0.00107361	UC_GAG;UC_SEC3;UC_INV
P60468	SC61B_HUMAN Protein transport protein Sec61 subunit beta OS=Homo sapiens GN=SEC61B PE=1 SV=2	No	2	2	0.00107367	UC_INV;UC_SEC3;UC_GAG
P02763	A1AG1_HUMAN Alpha-1-acid glycoprotein 1 OS=Homo sapiens GN=ORM1 PE=1 SV=1	Yes	12	8	0.00107585	GAG_UC;SEC3_UC;GAG_INV;SEC3_INV
O75390	CISY_HUMAN Citrate synthase, mitochondrial OS=Homo sapiens GN=CS PE=1 SV=2	No	2	2	0.00108072	UC_SEC3;UC_GAG;UC_INV
Q96PD5	PGRP2_HUMAN N-acetylmuramoyl-L-alanine amidase OS=Homo sapiens GN=PGLYRP2 PE=1 SV=1	Yes	9	9	0.00108083	GAG_UC;INV_UC;SEC3_UC
P62269	RS18_HUMAN 40S ribosomal protein S18 OS=Homo sapiens GN=RPS18 PE=1 SV=3	No	7	7	0.00108121	UC_INV;UC_SEC3;UC_GAG
P43307	SSRA_HUMAN Translocon-associated protein subunit alpha OS=Homo sapiens GN=SSR1 PE=1 SV=3	Yes	3	3	0.00113011	UC_INV;UC_SEC3;UC_GAG
P04899	GNAI2_HUMAN Guanine nucleotide-binding protein G(i) subunit alpha-2 OS=Homo sapiens GN=GNAI2 PE=1 SV=3;sp	No	3	2	0.00115774	GAG_INV;GAG_SEC3;GAG_UC
P00488	F13A_HUMAN Coagulation factor XIII A chain OS=Homo sapiens GN=F13A1 PE=1 SV=4	Yes	7	7	0.00116672	GAG_SEC3;GAG_INV;GAG_UC
P21912	SDHB_HUMAN Succinate dehydrogenase [ubiquinone] iron-sulfur subunit, mitochondrial OS=Homo sapiens GN=SDHB PE=1 SV=3	No	6	6	0.00117305	UC_SEC3;UC_GAG;UC_INV
Q92954	PRG4_HUMAN Proteoglycan 4 OS=Homo sapiens GN=PRG4 PE=1 SV=2	Yes	3	3	0.00117752	SEC3_INV;SEC3_UC;SEC3_GAG
P01719	LV501_HUMAN Ig lambda chain V-V region DEL OS=Homo sapiens PE=1 SV=1	No	2	2	0.00118077	GAG_UC;SEC3_UC;INV_UC
P05166	PCCB_HUMAN Propionyl-CoA carboxylase beta chain, mitochondrial OS=Homo sapiens GN=PCCB PE=1 SV=3	No	2	2	0.00124887	UC_INV;UC_GAG;UC_SEC3
Q13228	SBP1_HUMAN Selenium-binding protein 1 OS=Homo sapiens GN=SELENBP1 PE=1 SV=2	No	2	2	0.00125051	UC_SEC3;UC_GAG;UC_INV
P27918	PROP_HUMAN Properdin OS=Homo sapiens GN=CFP PE=1 SV=2	Yes	9	9	0.00126598	SEC3_UC;GAG_UC;INV_UC
P11021	GRP78_HUMAN 78 kDa glucose-regulated protein OS=Homo sapiens GN=HSPA5 PE=1 SV=2	No	24	23	0.00126598	UC_SEC3;UC_INV;UC_GAG
Q9NX63	MIC19_HUMAN MICOS complex subunit MIC19 OS=Homo sapiens GN=CHCHD3 PE=1 SV=1	No	3	3	0.00134121	UC_INV;UC_GAG;UC_SEC3
P27635	RL10_HUMAN 60S ribosomal protein L10 OS=Homo sapiens GN=RPL10 PE=1 SV=4;sp	No	4	4	0.00135215	UC_SEC3;UC_INV;UC_GAG
P01877	IGHA2_HUMAN Ig alpha-2 chain C region OS=Homo sapiens GN=IGHA2 PE=1 SV=3	Yes	21	4	0.00135465	INV_UC;SEC3_UC;SEC3_GAG
P68431	H31_HUMAN Histone H3.1 OS=Homo sapiens GN=HIST1H3A PE=1 SV=2	No	6	1	0.00135465	UC_SEC3;UC_INV;UC_GAG
P15880	RS2_HUMAN 40S ribosomal protein S2 OS=Homo sapiens GN=RPS2 PE=1 SV=2	No	6	6	0.00137323	UC_GAG;UC_INV;UC_SEC3
P69905	HBA_HUMAN Hemoglobin subunit alpha OS=Homo sapiens GN=HBA1 PE=1 SV=2	Yes	7	3	0.00139755	SEC3_GAG;SEC3_UC
P25311	ZA2G_HUMAN Zinc-alpha-2-glycoprotein OS=Homo sapiens GN=AZGP1 PE=1 SV=2	Yes	18	17	0.00145713	SEC3_UC;SEC3_INV
Q16891	MIC60_HUMAN MICOS complex subunit MIC60 OS=Homo sapiens GN=IMMT PE=1 SV=1	No	6	6	0.0014709	UC_SEC3;UC_GAG;UC_INV
P24903	CP2F1_HUMAN Cytochrome P450 2F1 OS=Homo sapiens GN=CYP2F1 PE=1 SV=2	No	3	3	0.00149411	UC_GAG;UC_SEC3;UC_INV
P35232	PHB_HUMAN Prohibitin OS=Homo sapiens GN=PHB PE=1 SV=1	No	11	11	0.00149411	UC_GAG;UC_SEC3;UC_INV
P46977	STT3A_HUMAN Dolichyl-diphosphooligosaccharide--protein glycosyltransferase subunit STT3A OS=Homo sapiens GN=STT3A PE=1 SV=2	Yes	7	7	0.00150632	UC_GAG;UC_SEC3;UC_INV
P13671	CO6_HUMAN Complement component C6 OS=Homo sapiens GN=C6 PE=1 SV=3	Yes	19	19	0.00156191	INV_UC;SEC3_UC;GAG_UC
P10606	COX5B_HUMAN Cytochrome c oxidase subunit 5B, mitochondrial OS=Homo sapiens GN=COX5B PE=1 SV=2	No	2	2	0.00159251	UC_SEC3;UC_GAG;UC_INV
Q9P0L0	VAPA_HUMAN Vesicle-associated membrane protein-associated protein A OS=Homo sapiens GN=VAPA PE=1 SV=3	No	2	1	0.00160061	UC_GAG;UC_INV;UC_SEC3
O75452	RDH16_HUMAN Retinol dehydrogenase 16 OS=Homo sapiens GN=RDH16 PE=1 SV=2	No	5	4	0.00163823	UC_SEC3;UC_GAG;UC_INV
P67812	SC11A_HUMAN Signal peptidase complex catalytic subunit SEC11A OS=Homo sapiens GN=SEC11A PE=1 SV=1	No	4	4	0.00164801	UC_INV;SEC3_INV
A3KMH1	VWA8_HUMAN von Willebrand factor A domain-containing protein 8 OS=Homo sapiens GN=VWA8 PE=1 SV=2	Yes	2	2	0.00165298	UC_GAG;UC_INV;UC_SEC3
P18428	LBP_HUMAN Lipopolysaccharide-binding protein OS=Homo sapiens GN=LBP PE=1 SV=3	Yes	4	4	0.00178199	GAG_INV;GAG_SEC3;GAG_UC
P07437	TBB5_HUMAN Tubulin beta chain OS=Homo sapiens GN=TUBB PE=1 SV=2	No	11	2	0.0018422	UC_SEC3;UC_GAG;UC_INV
P43304	GPDM_HUMAN Glycerol-3-phosphate dehydrogenase, mitochondrial OS=Homo sapiens GN=GPD2 PE=1 SV=3	No	4	3	0.00186219	UC_GAG;UC_SEC3;UC_INV
O43772	MCAT_HUMAN Mitochondrial carnitine/acylcarnitine carrier protein OS=Homo sapiens GN=SLC25A20 PE=1 SV=1	No	6	6	0.00190116	UC_SEC3;UC_GAG;UC_INV
Q16777	H2A2C_HUMAN Histone H2A type 2-C OS=Homo sapiens GN=HIST2H2AC PE=1 SV=4;sp	No	5	1	0.00193276	GAG_INV;UC_INV;UC_SEC3
Q9UBM7	DHCR7_HUMAN 7-dehydrocholesterol reductase OS=Homo sapiens GN=DHCR7 PE=1 SV=1	No	2	2	0.00195022	UC_GAG;UC_INV;UC_SEC3
P02753	RET4_HUMAN Retinol-binding protein 4 OS=Homo sapiens GN=RBP4 PE=1 SV=3	No	9	8	0.00204557	SEC3_UC;GAG_UC;GAG_INV
Q5IFJ7	RL9_MACFA 60S ribosomal protein L9 OS=Macaca fascicularis GN=RPL9 PE=2 SV=1;sp	No	2	2	0.00211607	UC_GAG;UC_SEC3;UC_INV
P62244	RS15A_HUMAN 40S ribosomal protein S15a OS=Homo sapiens GN=RPS15A PE=1 SV=2	No	5	5	0.00215096	UC_GAG;UC_INV;UC_SEC3
P62280	RS11_HUMAN 40S ribosomal protein S11 OS=Homo sapiens GN=RPS11 PE=1 SV=3	No	7	7	0.00215218	UC_SEC3;UC_INV
P50213	IDH3A_HUMAN Isocitrate dehydrogenase [NAD] subunit alpha, mitochondrial OS=Homo sapiens GN=IDH3A PE=1 SV=1	No	3	3	0.00217862	UC_SEC3;UC_GAG;UC_INV
P51149	RAB7A_HUMAN Ras-related protein Rab-7a OS=Homo sapiens GN=RAB7A PE=1 SV=1	No	3	3	0.00223763	UC_GAG;UC_SEC3;UC_INV
Q00610	CLH1_HUMAN Clathrin heavy chain 1 OS=Homo sapiens GN=CLTC PE=1 SV=5	No	25	25	0.00228262	UC_SEC3;UC_GAG;UC_INV
P10809	CH60_HUMAN 60 kDa heat shock protein, mitochondrial OS=Homo sapiens GN=HSPD1 PE=1 SV=2	No	11	10	0.00230251	UC_INV;UC_SEC3
Q7Z406	MYH14_HUMAN Myosin-14 OS=Homo sapiens GN=MYH14 PE=1 SV=2	No	4	1	0.00230752	UC_SEC3;UC_INV;UC_GAG
P00748	FA12_HUMAN Coagulation factor XII OS=Homo sapiens GN=F12 PE=1 SV=3	Yes	5	5	0.00236917	SEC3_UC;INV_UC;GAG_UC
Q9BVK6	TMED9_HUMAN Transmembrane emp24 domain-containing protein 9 OS=Homo sapiens GN=TMED9 PE=1 SV=2	Yes	3	1	0.00240691	UC_GAG;UC_INV
P49368	TCPG_HUMAN T-complex protein 1 subunit gamma OS=Homo sapiens GN=CCT3 PE=1 SV=4	No	4	4	0.00241474	UC_GAG;UC_SEC3;UC_INV
P49755	TMEDA_HUMAN Transmembrane emp24 domain-containing protein 10 OS=Homo sapiens GN=TMED10 PE=1 SV=2	Yes	4	4	0.0025295	UC_GAG;UC_INV;UC_SEC3
P35579	MYH9_HUMAN Myosin-9 OS=Homo sapiens GN=MYH9 PE=1 SV=4	No	24	19	0.0026286	UC_INV;UC_SEC3
P01743	HV102_HUMAN Ig heavy chain V-I region HG3 OS=Homo sapiens PE=3 SV=1	No	2	2	0.00269979	SEC3_UC;GAG_UC;GAG_INV
P63104	1433Z_HUMAN 14-3-3 protein zeta/delta OS=Homo sapiens GN=YWHAZ PE=1 SV=1	No	6	6	0.00272904	UC_INV;GAG_INV
P18124	RL7_HUMAN 60S ribosomal protein L7 OS=Homo sapiens GN=RPL7 PE=1 SV=1	No	5	5	0.00281492	UC_INV;UC_SEC3
Q15365	PCBP1_HUMAN Poly(rC)-binding protein 1 OS=Homo sapiens GN=PCBP1 PE=1 SV=2	No	7	4	0.00291814	UC_SEC3;UC_INV;UC_GAG
P52597	HNRPF_HUMAN Heterogeneous nuclear ribonucleoprotein F OS=Homo sapiens GN=HNRNPF PE=1 SV=3	No	2	1	0.00294131	UC_INV;UC_GAG;UC_SEC3
Q9Y6R7	FCGBP_HUMAN IgGFc-binding protein OS=Homo sapiens GN=FCGBP PE=1 SV=3	Yes	20	20	0.00297959	SEC3_UC;GAG_UC;SEC3_INV;GAG_INV
P08590	MYL3_HUMAN Myosin light chain 3 OS=Homo sapiens GN=MYL3 PE=1 SV=3	No	3	3	0.00297959	UC_SEC3;UC_GAG;UC_INV
O00483	NDUA4_HUMAN Cytochrome c oxidase subunit NDUFA4 OS=Homo sapiens GN=NDUFA4 PE=1 SV=1	No	2	2	0.0029855	UC_INV;UC_SEC3;UC_GAG
P00533	EGFR_HUMAN Epidermal growth factor receptor OS=Homo sapiens GN=EGFR PE=1 SV=2	Yes	3	3	0.00298725	UC_INV;UC_GAG;UC_SEC3
P00739	HPTR_HUMAN Haptoglobin-related protein OS=Homo sapiens GN=HPR PE=2 SV=2	No	22	5	0.00300338	SEC3_INV;GAG_INV;SEC3_UC;GAG_UC
O75396	SC22B_HUMAN Vesicle-trafficking protein SEC22b OS=Homo sapiens GN=SEC22B PE=1 SV=4	No	4	4	0.00302249	UC_INV;UC_SEC3
O95563	MPC2_HUMAN Mitochondrial pyruvate carrier 2 OS=Homo sapiens GN=MPC2 PE=1 SV=1	No	2	2	0.00304234	UC_SEC3;UC_GAG;UC_INV
P51148	RAB5C_HUMAN Ras-related protein Rab-5C OS=Homo sapiens GN=RAB5C PE=1 SV=2	No	2	2	0.00304234	UC_GAG;UC_INV;UC_SEC3
P10643	CO7_HUMAN Complement component C7 OS=Homo sapiens GN=C7 PE=1 SV=2	Yes	22	19	0.00307112	SEC3_UC;GAG_UC;INV_UC
P10635	CP2D6_HUMAN Cytochrome P450 2D6 OS=Homo sapiens GN=CYP2D6 PE=1 SV=2;sp	No	2	2	0.00310177	UC_SEC3;UC_INV
P62847	RS24_HUMAN 40S ribosomal protein S24 OS=Homo sapiens GN=RPS24 PE=1 SV=1	No	4	3	0.00311916	UC_GAG;UC_SEC3;UC_INV
P17066	HSP76_HUMAN Heat shock 70 kDa protein 6 OS=Homo sapiens GN=HSPA6 PE=1 SV=2;sp	No	3	1	0.00324698	UC_SEC3;UC_INV;UC_GAG
P60709	ACTB_HUMAN Actin, cytoplasmic 1 OS=Homo sapiens GN=ACTB PE=1 SV=1	No	25	2	0.00324875	UC_INV;UC_GAG;UC_SEC3
P63092	GNAS2_HUMAN Guanine nucleotide-binding protein G(s) subunit alpha isoforms short OS=Homo sapiens GN=GNAS PE=1 SV=1;sp	No	2	1	0.00330771	UC_SEC3;UC_GAG;UC_INV
P15104	GLNA_HUMAN Glutamine synthetase OS=Homo sapiens GN=GLUL PE=1 SV=4	No	3	3	0.00334976	UC_GAG;UC_SEC3;UC_INV
P01023	A2MG_HUMAN Alpha-2-macroglobulin OS=Homo sapiens GN=A2M PE=1 SV=3	Yes	102	89	0.0034045	INV_UC;GAG_UC;SEC3_UC
P28288	ABCD3_HUMAN ATP-binding cassette sub-family D member 3 OS=Homo sapiens GN=ABCD3 PE=1 SV=1	Yes	12	11	0.00358945	UC_GAG;UC_SEC3;UC_INV
P09486	SPRC_HUMAN SPARC OS=Homo sapiens GN=SPARC PE=1 SV=1	Yes	6	6	0.00360294	GAG_INV;GAG_SEC3;GAG_UC
P17844	DDX5_HUMAN Probable ATP-dependent RNA helicase DDX5 OS=Homo sapiens GN=DDX5 PE=1 SV=1	No	11	8	0.00375752	UC_GAG;UC_SEC3;UC_INV
Q71UI9	H2AV_HUMAN Histone H2A.V OS=Homo sapiens GN=H2AFV PE=1 SV=3;sp	No	4	2	0.00376963	UC_INV;UC_SEC3;UC_GAG
P35858	ALS_HUMAN Insulin-like growth factor-binding protein complex acid labile subunit OS=Homo sapiens GN=IGFALS PE=1 SV=1	Yes	6	6	0.00383823	SEC3_UC;GAG_UC;GAG_INV
P02746	C1QB_HUMAN Complement C1q subcomponent subunit B OS=Homo sapiens GN=C1QB PE=1 SV=3	No	10	10	0.00385618	GAG_UC;GAG_SEC3
P62753	RS6_HUMAN 40S ribosomal protein S6 OS=Homo sapiens GN=RPS6 PE=1 SV=1	No	5	5	0.00393458	UC_SEC3;UC_INV;UC_GAG
P27797	CALR_HUMAN Calreticulin OS=Homo sapiens GN=CALR PE=1 SV=1	Yes	2	2	0.00396683	UC_SEC3;GAG_SEC3;GAG_INV
Q14697	GANAB_HUMAN Neutral alpha-glucosidase AB OS=Homo sapiens GN=GANAB PE=1 SV=3	Yes	2	2	0.00396683	UC_GAG;UC_SEC3
P40939	ECHA_HUMAN Trifunctional enzyme subunit alpha, mitochondrial OS=Homo sapiens GN=HADHA PE=1 SV=2	No	5	5	0.00396683	UC_INV;UC_SEC3;UC_GAG
P49913	CAMP_HUMAN Cathelicidin antimicrobial peptide OS=Homo sapiens GN=CAMP PE=1 SV=1	No	3	3	0.00396683	UC_GAG;SEC3_GAG;INV_GAG
Q9ULC5	ACSL5_HUMAN Long-chain-fatty-acid--CoA ligase 5 OS=Homo sapiens GN=ACSL5 PE=1 SV=1	No	4	3	0.00396683	UC_GAG;UC_SEC3;UC_INV
Q9Y619	ORNT1_HUMAN Mitochondrial ornithine transporter 1 OS=Homo sapiens GN=SLC25A15 PE=1 SV=1	No	5	5	0.00396683	UC_INV;UC_SEC3;UC_GAG
P18077	RL35A_HUMAN 60S ribosomal protein L35a OS=Homo sapiens GN=RPL35A PE=1 SV=2	No	6	6	0.00396683	UC_INV;UC_SEC3;UC_GAG
P49327	FAS_HUMAN Fatty acid synthase OS=Homo sapiens GN=FASN PE=1 SV=3	No	6	5	0.00396683	UC_INV;UC_SEC3
O95202	LETM1_HUMAN LETM1 and EF-hand domain-containing protein 1, mitochondrial OS=Homo sapiens GN=LETM1 PE=1 SV=1	No	4	4	0.00419471	UC_INV;UC_SEC3;UC_GAG
P62318	SMD3_HUMAN Small nuclear ribonucleoprotein Sm D3 OS=Homo sapiens GN=SNRPD3 PE=1 SV=1	No	2	2	0.0042433	UC_GAG;UC_SEC3;UC_INV
P46777	RL5_HUMAN 60S ribosomal protein L5 OS=Homo sapiens GN=RPL5 PE=1 SV=3	No	2	2	0.00440149	UC_INV;UC_GAG
Q99798	ACON_HUMAN Aconitate hydratase, mitochondrial OS=Homo sapiens GN=ACO2 PE=1 SV=2	No	2	2	0.00441519	UC_SEC3;UC_INV
Q9NZB2	F120A_HUMAN Constitutive coactivator of PPAR-gamma-like protein 1 OS=Homo sapiens GN=FAM120A PE=1 SV=2	No	2	2	0.00442348	UC_GAG;SEC3_GAG;SEC3_INV
P04843	RPN1_HUMAN Dolichyl-diphosphooligosaccharide--protein glycosyltransferase subunit 1 OS=Homo sapiens GN=RPN1 PE=1 SV=1	Yes	5	5	0.00457016	UC_GAG;UC_SEC3;UC_INV
P61353	RL27_HUMAN 60S ribosomal protein L27 OS=Homo sapiens GN=RPL27 PE=1 SV=2	No	3	3	0.00462661	UC_INV;UC_SEC3;UC_GAG
Q8NC51	PAIRB_HUMAN Plasminogen activator inhibitor 1 RNA-binding protein OS=Homo sapiens GN=SERBP1 PE=1 SV=2	No	2	2	0.00466399	UC_SEC3;UC_INV
Q13885	TBB2A_HUMAN Tubulin beta-2A chain OS=Homo sapiens GN=TUBB2A PE=1 SV=1;sp	No	11	2	0.00466399	UC_INV;UC_GAG;UC_SEC3
P31943	HNRH1_HUMAN Heterogeneous nuclear ribonucleoprotein H OS=Homo sapiens GN=HNRNPH1 PE=1 SV=4	No	2	0	0.00470315	UC_GAG;UC_INV;UC_SEC3
Q9UNX3	RL26L_HUMAN 60S ribosomal protein L26-like 1 OS=Homo sapiens GN=RPL26L1 PE=1 SV=1;sp	No	2	2	0.00470315	SEC3_GAG;UC_GAG;UC_INV
P21796	VDAC1_HUMAN Voltage-dependent anion-selective channel protein 1 OS=Homo sapiens GN=VDAC1 PE=1 SV=2	No	10	10	0.00470315	UC_INV;UC_GAG;UC_SEC3
O75746	CMC1_HUMAN Calcium-binding mitochondrial carrier protein Aralar1 OS=Homo sapiens GN=SLC25A12 PE=1 SV=2	No	7	4	0.00472119	UC_SEC3;UC_INV
P47756	CAPZB_HUMAN F-actin-capping protein subunit beta OS=Homo sapiens GN=CAPZB PE=1 SV=4	No	2	2	0.00472119	UC_GAG;UC_SEC3
Q14999	CUL7_HUMAN Cullin-7 OS=Homo sapiens GN=CUL7 PE=1 SV=2;sp	No	2	2	0.00476951	GAG_UC;SEC3_UC
P53396	ACLY_HUMAN ATP-citrate synthase OS=Homo sapiens GN=ACLY PE=1 SV=3	No	4	4	0.00489553	UC_SEC3;UC_GAG;UC_INV
P19105	ML12A_HUMAN Myosin regulatory light chain 12A OS=Homo sapiens GN=MYL12A PE=1 SV=2;sp	No	3	3	0.00493809	UC_GAG;UC_INV
Q9NYY8	FAKD2_HUMAN FAST kinase domain-containing protein 2, mitochondrial OS=Homo sapiens GN=FASTKD2 PE=1 SV=1	No	2	2	0.00497793	UC_GAG;UC_SEC3;UC_INV
P07237	PDIA1_HUMAN Protein disulfide-isomerase OS=Homo sapiens GN=P4HB PE=1 SV=3	No	9	9	0.00497793	UC_INV;UC_SEC3
O00264	PGRC1_HUMAN Membrane-associated progesterone receptor component 1 OS=Homo sapiens GN=PGRMC1 PE=1 SV=3	No	6	6	0.00497839	UC_GAG;UC_INV;UC_SEC3
P23396	RS3_HUMAN 40S ribosomal protein S3 OS=Homo sapiens GN=RPS3 PE=1 SV=2	No	12	12	0.0049852	UC_INV;UC_GAG;UC_SEC3
P22792	CPN2_HUMAN Carboxypeptidase N subunit 2 OS=Homo sapiens GN=CPN2 PE=1 SV=3	Yes	6	6	0.00507423	SEC3_UC;GAG_UC;SEC3_INV;GAG_INV
P50991	TCPD_HUMAN T-complex protein 1 subunit delta OS=Homo sapiens GN=CCT4 PE=1 SV=4	No	5	5	0.00521189	UC_GAG;UC_SEC3
O14925	TIM23_HUMAN Mitochondrial import inner membrane translocase subunit Tim23 OS=Homo sapiens GN=TIMM23 PE=1 SV=1;sp	No	2	2	0.00521189	UC_INV;UC_SEC3;UC_GAG
P63010	AP2B1_HUMAN AP-2 complex subunit beta OS=Homo sapiens GN=AP2B1 PE=1 SV=1;sp	No	3	3	0.00525706	INV_GAG;SEC3_GAG
P05181	CP2E1_HUMAN Cytochrome P450 2E1 OS=Homo sapiens GN=CYP2E1 PE=1 SV=1	No	4	3	0.00545475	UC_GAG;UC_SEC3
P61106	RAB14_HUMAN Ras-related protein Rab-14 OS=Homo sapiens GN=RAB14 PE=1 SV=4	No	4	4	0.00576115	UC_GAG;UC_SEC3;UC_INV
P51659	DHB4_HUMAN Peroxisomal multifunctional enzyme type 2 OS=Homo sapiens GN=HSD17B4 PE=1 SV=3	No	4	4	0.00586077	UC_SEC3;UC_INV
P00395	COX1_HUMAN Cytochrome c oxidase subunit 1 OS=Homo sapiens GN=MT-CO1 PE=1 SV=1	No	2	2	0.00586077	UC_INV;UC_SEC3
P52272	HNRPM_HUMAN Heterogeneous nuclear ribonucleoprotein M OS=Homo sapiens GN=HNRNPM PE=1 SV=3	No	7	6	0.00586077	UC_SEC3;UC_GAG;UC_INV
Q15582	BGH3_HUMAN Transforming growth factor-beta-induced protein ig-h3 OS=Homo sapiens GN=TGFBI PE=1 SV=1	No	5	5	0.00591389	GAG_SEC3;GAG_UC;GAG_INV
Q9UBX3	DIC_HUMAN Mitochondrial dicarboxylate carrier OS=Homo sapiens GN=SLC25A10 PE=1 SV=2	No	3	2	0.00603414	UC_GAG;UC_INV;UC_SEC3
P12694	ODBA_HUMAN 2-oxoisovalerate dehydrogenase subunit alpha, mitochondrial OS=Homo sapiens GN=BCKDHA PE=1 SV=2	No	4	4	0.00604952	UC_SEC3;UC_GAG;UC_INV
A0M8Q6	LAC7_HUMAN Ig lambda-7 chain C region OS=Homo sapiens GN=IGLC7 PE=4 SV=2	No	9	4	0.00627829	GAG_UC;INV_UC;SEC3_UC
P02776	PLF4_HUMAN Platelet factor 4 OS=Homo sapiens GN=PF4 PE=1 SV=2;sp	No	6	6	0.00627829	SEC3_UC;GAG_UC
P00742	FA10_HUMAN Coagulation factor X OS=Homo sapiens GN=F10 PE=1 SV=2	Yes	10	10	0.00638197	GAG_INV;GAG_UC
P49748	ACADV_HUMAN Very long-chain specific acyl-CoA dehydrogenase, mitochondrial OS=Homo sapiens GN=ACADVL PE=1 SV=1	No	3	3	0.00638197	UC_GAG;UC_SEC3
P40926	MDHM_HUMAN Malate dehydrogenase, mitochondrial OS=Homo sapiens GN=MDH2 PE=1 SV=3	Yes	3	3	0.00690044	UC_GAG;UC_SEC3;UC_INV
P48740	MASP1_HUMAN Mannan-binding lectin serine protease 1 OS=Homo sapiens GN=MASP1 PE=1 SV=3	Yes	9	8	0.00696357	SEC3_UC;GAG_UC
P31025	LCN1_HUMAN Lipocalin-1 OS=Homo sapiens GN=LCN1 PE=1 SV=1	No	5	5	0.00701165	INV_GAG
P36776	LONM_HUMAN Lon protease homolog, mitochondrial OS=Homo sapiens GN=LONP1 PE=1 SV=2	No	3	2	0.00728638	UC_SEC3;UC_GAG
P84103	SRSF3_HUMAN Serine/arginine-rich splicing factor 3 OS=Homo sapiens GN=SRSF3 PE=1 SV=1	No	3	3	0.00731082	UC_GAG;UC_INV
P62857	RS28_HUMAN 40S ribosomal protein S28 OS=Homo sapiens GN=RPS28 PE=1 SV=1	No	2	2	0.00741027	UC_GAG;UC_INV;UC_SEC3
P18621	RL17_HUMAN 60S ribosomal protein L17 OS=Homo sapiens GN=RPL17 PE=1 SV=3	No	4	4	0.00770202	UC_SEC3;GAG_SEC3;GAG_INV
P16070	CD44_HUMAN CD44 antigen OS=Homo sapiens GN=CD44 PE=1 SV=3	Yes	3	3	0.00787039	GAG_INV;GAG_SEC3
O14983	AT2A1_HUMAN Sarcoplasmic/endoplasmic reticulum calcium ATPase 1 OS=Homo sapiens GN=ATP2A1 PE=1 SV=1	No	20	9	0.00787039	UC_GAG
Q5T750	XP32_HUMAN Skin-specific protein 32 OS=Homo sapiens GN=XP32 PE=1 SV=1	No	2	2	0.00803668	UC_INV;UC_GAG;UC_SEC3
P02788	TRFL_HUMAN Lactotransferrin OS=Homo sapiens GN=LTF PE=1 SV=6	Yes	5	4	0.00833578	INV_UC;INV_SEC3
Q12931	TRAP1_HUMAN Heat shock protein 75 kDa, mitochondrial OS=Homo sapiens GN=TRAP1 PE=1 SV=3	No	6	6	0.00833578	UC_GAG
Q9UBS4	DJB11_HUMAN DnaJ homolog subfamily B member 11 OS=Homo sapiens GN=DNAJB11 PE=1 SV=1	Yes	2	2	0.00848181	UC_SEC3;UC_GAG;UC_INV
P36955	PEDF_HUMAN Pigment epithelium-derived factor OS=Homo sapiens GN=SERPINF1 PE=1 SV=4	Yes	12	12	0.00848181	GAG_UC
P51991	ROA3_HUMAN Heterogeneous nuclear ribonucleoprotein A3 OS=Homo sapiens GN=HNRNPA3 PE=1 SV=2	No	5	5	0.00852794	UC_SEC3;UC_INV;UC_GAG
P13804	ETFA_HUMAN Electron transfer flavoprotein subunit alpha, mitochondrial OS=Homo sapiens GN=ETFA PE=1 SV=1	No	4	4	0.00855112	UC_GAG;UC_INV
O95292	VAPB_HUMAN Vesicle-associated membrane protein-associated protein B/C OS=Homo sapiens GN=VAPB PE=1 SV=3	No	3	2	0.00862968	UC_GAG;UC_INV
P40429	RL13A_HUMAN 60S ribosomal protein L13a OS=Homo sapiens GN=RPL13A PE=1 SV=2;sp	No	3	3	0.00915349	UC_GAG;UC_INV
P01764	HV323_HUMAN Ig heavy chain V-III region 23 OS=Homo sapiens GN=IGHV3-23 PE=1 SV=2	No	7	5	0.00915349	GAG_UC
Q9UK55	ZPI_HUMAN Protein Z-dependent protease inhibitor OS=Homo sapiens GN=SERPINA10 PE=1 SV=1	Yes	2	1	0.00916488	GAG_INV;GAG_UC;GAG_SEC3
O14975	S27A2_HUMAN Very long-chain acyl-CoA synthetase OS=Homo sapiens GN=SLC27A2 PE=1 SV=2	No	4	4	0.00916488	UC_GAG;UC_INV;UC_SEC3
P62081	RS7_HUMAN 40S ribosomal protein S7 OS=Homo sapiens GN=RPS7 PE=1 SV=1	No	5	5	0.00916488	UC_INV;UC_GAG
P05090	APOD_HUMAN Apolipoprotein D OS=Homo sapiens GN=APOD PE=1 SV=1	Yes	12	12	0.00919996	SEC3_UC;SEC3_GAG
O00571	DDX3X_HUMAN ATP-dependent RNA helicase DDX3X OS=Homo sapiens GN=DDX3X PE=1 SV=3;sp	No	6	5	0.00955627	UC_INV;UC_SEC3
Q6DD88	ATLA3_HUMAN Atlastin-3 OS=Homo sapiens GN=ATL3 PE=1 SV=1	No	2	2	0.00963747	UC_SEC3;UC_GAG;UC_INV
P53618	COPB_HUMAN Coatomer subunit beta OS=Homo sapiens GN=COPB1 PE=1 SV=3	No	6	6	0.00983742	UC_SEC3;UC_GAG
P07910	HNRPC_HUMAN Heterogeneous nuclear ribonucleoproteins C1/C2 OS=Homo sapiens GN=HNRNPC PE=1 SV=4;sp	No	2	2	0.0102912	UC_SEC3;UC_INV
P48735	IDHP_HUMAN Isocitrate dehydrogenase [NADP], mitochondrial OS=Homo sapiens GN=IDH2 PE=1 SV=2	No	2	2	0.0102912	UC_GAG;UC_SEC3
P54136	SYRC_HUMAN Arginine--tRNA ligase, cytoplasmic OS=Homo sapiens GN=RARS PE=1 SV=2	No	2	2	0.0105417	UC_GAG;UC_SEC3;UC_INV
P60842	IF4A1_HUMAN Eukaryotic initiation factor 4A-I OS=Homo sapiens GN=EIF4A1 PE=1 SV=1;sp	No	7	6	0.0106011	UC_INV;UC_SEC3
Q14764	MVP_HUMAN Major vault protein OS=Homo sapiens GN=MVP PE=1 SV=4	No	3	3	0.0107724	UC_SEC3;UC_INV
Q8WUM4	PDC6I_HUMAN Programmed cell death 6-interacting protein OS=Homo sapiens GN=PDCD6IP PE=1 SV=1	No	3	3	0.0109935	UC_GAG;UC_INV;UC_SEC3
Q15084	PDIA6_HUMAN Protein disulfide-isomerase A6 OS=Homo sapiens GN=PDIA6 PE=1 SV=1	No	2	2	0.011161	UC_SEC3;UC_GAG
Q15436	SC23A_HUMAN Protein transport protein Sec23A OS=Homo sapiens GN=SEC23A PE=1 SV=2	No	4	3	0.0111945	UC_SEC3;UC_GAG;UC_INV
P61006	RAB8A_HUMAN Ras-related protein Rab-8A OS=Homo sapiens GN=RAB8A PE=1 SV=1;sp	No	2	1	0.0117311	UC_GAG;UC_SEC3;UC_INV
P35606	COPB2_HUMAN Coatomer subunit beta OS=Homo sapiens GN=COPB2 PE=1 SV=2	No	4	4	0.01179	UC_GAG;UC_SEC3
P04209	LV211_HUMAN Ig lambda chain V-II region NIG-84 OS=Homo sapiens PE=1 SV=1	No	2	2	0.0121857	INV_GAG;SEC3_GAG;SEC3_UC
O43272	PROD_HUMAN Proline dehydrogenase 1, mitochondrial OS=Homo sapiens GN=PRODH PE=1 SV=3	No	6	5	0.01219	UC_SEC3;UC_GAG
P05089	ARGI1_HUMAN Arginase-1 OS=Homo sapiens GN=ARG1 PE=1 SV=2	No	3	3	0.0122277	UC_INV;UC_GAG
Q15717	ELAV1_HUMAN ELAV-like protein 1 OS=Homo sapiens GN=ELAVL1 PE=1 SV=2	No	2	2	0.0122474	UC_INV;UC_SEC3
Q3LXA3	TKFC_HUMAN Triokinase/FMN cyclase OS=Homo sapiens GN=TKFC PE=1 SV=2	No	3	3	0.0122663	UC_INV
P02750	A2GL_HUMAN Leucine-rich alpha-2-glycoprotein OS=Homo sapiens GN=LRG1 PE=1 SV=2	Yes	7	7	0.0125226	SEC3_UC;SEC3_GAG
P13639	EF2_HUMAN Elongation factor 2 OS=Homo sapiens GN=EEF2 PE=1 SV=4	No	5	4	0.0125226	GAG_SEC3;GAG_INV
P62913	RL11_HUMAN 60S ribosomal protein L11 OS=Homo sapiens GN=RPL11 PE=1 SV=2	No	4	4	0.0125226	UC_SEC3;UC_GAG
P01620	KV302_HUMAN Ig kappa chain V-III region SIE OS=Homo sapiens PE=1 SV=1	No	6	1	0.012866	INV_SEC3;INV_GAG
P16435	NCPR_HUMAN NADPH--cytochrome P450 reductase OS=Homo sapiens GN=POR PE=1 SV=2	No	10	10	0.013067	UC_INV;UC_SEC3
O95342	ABCBB_HUMAN Bile salt export pump OS=Homo sapiens GN=ABCB11 PE=1 SV=2	Yes	2	2	0.0131298	UC_SEC3;UC_GAG;UC_INV
P01019	ANGT_HUMAN Angiotensinogen OS=Homo sapiens GN=AGT PE=1 SV=1	Yes	12	12	0.0131298	GAG_INV;GAG_UC
P18135	KV312_HUMAN Ig kappa chain V-III region HAH OS=Homo sapiens PE=2 SV=1;sp	No	8	0	0.0131298	INV_SEC3;INV_GAG;INV_UC
P09601	HMOX1_HUMAN Heme oxygenase 1 OS=Homo sapiens GN=HMOX1 PE=1 SV=1	No	3	2	0.0131298	UC_GAG;UC_SEC3
P14866	HNRPL_HUMAN Heterogeneous nuclear ribonucleoprotein L OS=Homo sapiens GN=HNRNPL PE=1 SV=2	No	5	5	0.0133378	GAG_SEC3
P60866	RS20_HUMAN 40S ribosomal protein S20 OS=Homo sapiens GN=RPS20 PE=1 SV=1	No	4	4	0.0133842	UC_SEC3;UC_GAG
P11940	PABP1_HUMAN Polyadenylate-binding protein 1 OS=Homo sapiens GN=PABPC1 PE=1 SV=2;sp	No	6	6	0.0134931	UC_SEC3;UC_GAG;UC_INV
Q9Y678	COPG1_HUMAN Coatomer subunit gamma-1 OS=Homo sapiens GN=COPG1 PE=1 SV=1	No	3	3	0.0137093	UC_SEC3;UC_GAG;UC_INV
Q13201	MMRN1_HUMAN Multimerin-1 OS=Homo sapiens GN=MMRN1 PE=1 SV=3	Yes	3	3	0.013857	GAG_INV
P00367	DHE3_HUMAN Glutamate dehydrogenase 1, mitochondrial OS=Homo sapiens GN=GLUD1 PE=1 SV=2;sp	No	9	8	0.0139556	UC_INV;UC_SEC3;UC_GAG
Q71U36	TBA1A_HUMAN Tubulin alpha-1A chain OS=Homo sapiens GN=TUBA1A PE=1 SV=1;sp	No	10	3	0.0139556	UC_INV;UC_SEC3
O14828	SCAM3_HUMAN Secretory carrier-associated membrane protein 3 OS=Homo sapiens GN=SCAMP3 PE=1 SV=3	No	2	2	0.0139556	UC_SEC3;UC_GAG
Q92496	FHR4_HUMAN Complement factor H-related protein 4 OS=Homo sapiens GN=CFHR4 PE=1 SV=3	Yes	3	2	0.0140625	INV_UC;GAG_UC
Q92544	TM9S4_HUMAN Transmembrane 9 superfamily member 4 OS=Homo sapiens GN=TM9SF4 PE=1 SV=2	No	2	2	0.0142223	UC_GAG
Q9UJZ1	STML2_HUMAN Stomatin-like protein 2, mitochondrial OS=Homo sapiens GN=STOML2 PE=1 SV=1	No	3	3	0.0145575	UC_SEC3
P63000	RAC1_HUMAN Ras-related C3 botulinum toxin substrate 1 OS=Homo sapiens GN=RAC1 PE=1 SV=1;sp	Yes	2	2	0.014859	UC_GAG;UC_SEC3
Q14152	EIF3A_HUMAN Eukaryotic translation initiation factor 3 subunit A OS=Homo sapiens GN=EIF3A PE=1 SV=1	No	3	3	0.0148643	UC_GAG
P06312	KV401_HUMAN Ig kappa chain V-IV region OS=Homo sapiens GN=IGKV4-1 PE=1 SV=1	No	2	2	0.0151071	GAG_UC
P13929	ENOB_HUMAN Beta-enolase OS=Homo sapiens GN=ENO3 PE=1 SV=5;sp	No	2	2	0.015188	GAG_SEC3
P49326	FMO5_HUMAN Dimethylaniline monooxygenase [N-oxide-forming] 5 OS=Homo sapiens GN=FMO5 PE=1 SV=2	No	2	2	0.0155706	UC_SEC3;UC_INV
P49638	TTPA_HUMAN Alpha-tocopherol transfer protein OS=Homo sapiens GN=TTPA PE=1 SV=1	No	3	3	0.0155706	UC_GAG;UC_SEC3
P01613	KV121_HUMAN Ig kappa chain V-I region Ni OS=Homo sapiens PE=1 SV=1	No	2	2	0.0161228	GAG_UC;SEC3_UC
P22695	QCR2_HUMAN Cytochrome b-c1 complex subunit 2, mitochondrial OS=Homo sapiens GN=UQCRC2 PE=1 SV=3	No	2	2	0.0168643	UC_GAG;UC_SEC3
P05452	TETN_HUMAN Tetranectin OS=Homo sapiens GN=CLEC3B PE=1 SV=3	Yes	4	4	0.0177623	SEC3_GAG;INV_GAG
P14923	PLAK_HUMAN Junction plakoglobin OS=Homo sapiens GN=JUP PE=1 SV=3	Yes	6	5	0.0182836	UC_GAG
P35222	CTNB1_HUMAN Catenin beta-1 OS=Homo sapiens GN=CTNNB1 PE=1 SV=1	Yes	2	2	0.0186941	UC_INV
P17661	DESM_HUMAN Desmin OS=Homo sapiens GN=DES PE=1 SV=3	No	5	2	0.0186941	UC_SEC3;UC_GAG;UC_INV
Q92841	DDX17_HUMAN Probable ATP-dependent RNA helicase DDX17 OS=Homo sapiens GN=DDX17 PE=1 SV=2	No	4	1	0.0186941	UC_SEC3;UC_INV
P00387	NB5R3_HUMAN NADH-cytochrome b5 reductase 3 OS=Homo sapiens GN=CYB5R3 PE=1 SV=3	No	2	2	0.0186941	UC_SEC3
P13535	MYH8_HUMAN Myosin-8 OS=Homo sapiens GN=MYH8 PE=1 SV=3	No	43	3	0.0190107	UC_GAG
Q8NHH9	ATLA2_HUMAN Atlastin-2 OS=Homo sapiens GN=ATL2 PE=1 SV=2	No	2	2	0.019307	UC_GAG;UC_INV
O60763	USO1_HUMAN General vesicular transport factor p115 OS=Homo sapiens GN=USO1 PE=1 SV=2	No	3	2	0.0199799	UC_GAG;UC_SEC3
P17987	TCPA_HUMAN T-complex protein 1 subunit alpha OS=Homo sapiens GN=TCP1 PE=1 SV=1	No	6	6	0.0199823
O60493	SNX3_HUMAN Sorting nexin-3 OS=Homo sapiens GN=SNX3 PE=1 SV=3	No	6	5	0.0202613	UC_SEC3
P08670	VIME_HUMAN Vimentin OS=Homo sapiens GN=VIM PE=1 SV=4	Yes	7	3	0.021176	UC_INV
P31040	SDHA_HUMAN Succinate dehydrogenase [ubiquinone] flavoprotein subunit, mitochondrial OS=Homo sapiens GN=SDHA PE=1 SV=2	No	6	6	0.0220364	UC_INV
Q13740	CD166_HUMAN CD166 antigen OS=Homo sapiens GN=ALCAM PE=1 SV=2	Yes	2	1	0.0223398	UC_SEC3
P39023	RL3_HUMAN 60S ribosomal protein L3 OS=Homo sapiens GN=RPL3 PE=1 SV=2	No	6	6	0.0232135	UC_INV
Q9NZ01	TECR_HUMAN Very-long-chain enoyl-CoA reductase OS=Homo sapiens GN=TECR PE=1 SV=1	Yes	2	2	0.0235099	UC_INV;UC_SEC3
P49821	NDUV1_HUMAN NADH dehydrogenase [ubiquinone] flavoprotein 1, mitochondrial OS=Homo sapiens GN=NDUFV1 PE=1 SV=4	No	4	4	0.0235099	UC_GAG
P01622	KV304_HUMAN Ig kappa chain V-III region Ti OS=Homo sapiens PE=1 SV=1	No	6	2	0.0235689	INV_GAG
P00740	FA9_HUMAN Coagulation factor IX OS=Homo sapiens GN=F9 PE=1 SV=2	Yes	10	10	0.0238825	GAG_UC;GAG_INV
P17980	PRS6A_HUMAN 26S protease regulatory subunit 6A OS=Homo sapiens GN=PSMC3 PE=1 SV=3	No	2	2	0.0247139	UC_GAG
P05976	MYL1_HUMAN Myosin light chain 1/3, skeletal muscle isoform OS=Homo sapiens GN=MYL1 PE=2 SV=3	No	6	6	0.0263613	UC_GAG;UC_SEC3
P02545	LMNA_HUMAN Prelamin-A/C OS=Homo sapiens GN=LMNA PE=1 SV=1	No	9	9	0.0267993	UC_INV
P36980	FHR2_HUMAN Complement factor H-related protein 2 OS=Homo sapiens GN=CFHR2 PE=1 SV=1	Yes	5	2	0.0268054	INV_GAG
O94973	AP2A2_HUMAN AP-2 complex subunit alpha-2 OS=Homo sapiens GN=AP2A2 PE=1 SV=2	No	4	2	0.0286881	UC_SEC3;UC_GAG
P08697	A2AP_HUMAN Alpha-2-antiplasmin OS=Homo sapiens GN=SERPINF2 PE=1 SV=3	Yes	15	15	0.030872	GAG_INV;GAG_UC
Q9UKX3	MYH13_HUMAN Myosin-13 OS=Homo sapiens GN=MYH13 PE=2 SV=2	No	23	2	0.0309856	UC_SEC3
P01771	HV310_HUMAN Ig heavy chain V-III region HIL OS=Homo sapiens PE=1 SV=1	No	3	1	0.0313247	GAG_INV
P19652	A1AG2_HUMAN Alpha-1-acid glycoprotein 2 OS=Homo sapiens GN=ORM2 PE=1 SV=2	Yes	6	3	0.0320454	GAG_INV
Q9NRP0	OSTC_HUMAN Oligosaccharyltransferase complex subunit OSTC OS=Homo sapiens GN=OSTC PE=1 SV=1	No	2	2	0.032798	UC_GAG
P55056	APOC4_HUMAN Apolipoprotein C-IV OS=Homo sapiens GN=APOC4 PE=1 SV=1	Yes	2	2	0.0353916	INV_UC
P11055	MYH3_HUMAN Myosin-3 OS=Homo sapiens GN=MYH3 PE=1 SV=3	No	25	1	0.0357458	UC_GAG
P29622	KAIN_HUMAN Kallistatin OS=Homo sapiens GN=SERPINA4 PE=1 SV=3	Yes	4	4	0.0385205	GAG_UC
Q9UDR5	AASS_HUMAN Alpha-aminoadipic semialdehyde synthase, mitochondrial OS=Homo sapiens GN=AASS PE=1 SV=1	No	2	2	0.0393424	UC_INV
Q9Y4L1	HYOU1_HUMAN Hypoxia up-regulated protein 1 OS=Homo sapiens GN=HYOU1 PE=1 SV=1	Yes	3	3	0.0405837	UC_GAG
O00187	MASP2_HUMAN Mannan-binding lectin serine protease 2 OS=Homo sapiens GN=MASP2 PE=1 SV=4	No	4	4	0.0411969	GAG_UC
P31930	QCR1_HUMAN Cytochrome b-c1 complex subunit 1, mitochondrial OS=Homo sapiens GN=UQCRC1 PE=1 SV=3	No	8	8	0.0422036	UC_SEC3
P68871	HBB_HUMAN Hemoglobin subunit beta OS=Homo sapiens GN=HBB PE=1 SV=2	Yes	12	5	0.0424353	SEC3_GAG
P06311	KV311_HUMAN Ig kappa chain V-III region IARC/BL41 OS=Homo sapiens PE=4 SV=1	No	2	2	0.0426389
P35542	SAA4_HUMAN Serum amyloid A-4 protein OS=Homo sapiens GN=SAA4 PE=1 SV=2	Yes	4	4	0.0436502	SEC3_INV
O43707	ACTN4_HUMAN Alpha-actinin-4 OS=Homo sapiens GN=ACTN4 PE=1 SV=2	No	7	3	0.044728	UC_INV
P31689	DNJA1_HUMAN DnaJ homolog subfamily A member 1 OS=Homo sapiens GN=DNAJA1 PE=1 SV=2	No	2	2	0.0448202
P06310	KV206_HUMAN Ig kappa chain V-II region RPMI 6410 OS=Homo sapiens PE=4 SV=1	No	3	2	0.0463021	SEC3_UC
P35221	CTNA1_HUMAN Catenin alpha-1 OS=Homo sapiens GN=CTNNA1 PE=1 SV=1	No	5	5	0.0499298	UC_GAG
P63244	RACK1_HUMAN Receptor of activated protein C kinase 1 OS=Homo sapiens GN=RACK1 PE=1 SV=3	No	5	5	0.0519398
P05154	IPSP_HUMAN Plasma serine protease inhibitor OS=Homo sapiens GN=SERPINA5 PE=1 SV=3	Yes	5	5	0.0538421	GAG_SEC3
P22087	FBRL_HUMAN rRNA 2-O-methyltransferase fibrillarin OS=Homo sapiens GN=FBL PE=1 SV=2	No	2	2	0.0541435
P04206	KV307_HUMAN Ig kappa chain V-III region GOL OS=Homo sapiens PE=1 SV=1	No	6	2	0.05533	GAG_INV
Q9UKX2	MYH2_HUMAN Myosin-2 OS=Homo sapiens GN=MYH2 PE=1 SV=1	No	62	9	0.05533	UC_SEC3
P22105	TENX_HUMAN Tenascin-X OS=Homo sapiens GN=TNXB PE=1 SV=4	Yes	6	6	0.0594115	GAG_INV
Q13162	PRDX4_HUMAN Peroxiredoxin-4 OS=Homo sapiens GN=PRDX4 PE=1 SV=1	No	3	2	0.0601177
Q9Y262	EIF3L_HUMAN Eukaryotic translation initiation factor 3 subunit L OS=Homo sapiens GN=EIF3L PE=1 SV=1	No	3	3	0.0617186
Q9Y3B3	TMED7_HUMAN Transmembrane emp24 domain-containing protein 7 OS=Homo sapiens GN=TMED7 PE=1 SV=2	Yes	2	2	0.0619272
Q9BXR6	FHR5_HUMAN Complement factor H-related protein 5 OS=Homo sapiens GN=CFHR5 PE=1 SV=1	Yes	5	4	0.0625848	INV_SEC3
Q9P0I2	EMC3_HUMAN ER membrane protein complex subunit 3 OS=Homo sapiens GN=EMC3 PE=1 SV=3	No	2	2	0.0671302
P07305	H10_HUMAN Histone H1.0 OS=Homo sapiens GN=H1F0 PE=1 SV=3	No	4	4	0.0678077
P07355	ANXA2_HUMAN Annexin A2 OS=Homo sapiens GN=ANXA2 PE=1 SV=2;sp	No	5	5	0.0683379
P16615	AT2A2_HUMAN Sarcoplasmic/endoplasmic reticulum calcium ATPase 2 OS=Homo sapiens GN=ATP2A2 PE=1 SV=1	No	15	3	0.0698146	UC_GAG
P08708	RS17_HUMAN 40S ribosomal protein S17 OS=Homo sapiens GN=RPS17 PE=1 SV=2	No	3	3	0.0731969
Q9Y490	TLN1_HUMAN Talin-1 OS=Homo sapiens GN=TLN1 PE=1 SV=3	No	6	6	0.0733687
Q5T749	KPRP_HUMAN Keratinocyte proline-rich protein OS=Homo sapiens GN=KPRP PE=1 SV=1	No	3	3	0.0741636
P06681	CO2_HUMAN Complement C2 OS=Homo sapiens GN=C2 PE=1 SV=2	Yes	4	4	0.0744308
Q71UM5	RS27L_HUMAN 40S ribosomal protein S27-like OS=Homo sapiens GN=RPS27L PE=1 SV=3;sp	No	3	3	0.0763231	UC_SEC3
P01614	KV201_HUMAN Ig kappa chain V-II region Cum OS=Homo sapiens PE=1 SV=1;sp	No	3	1	0.0795905	INV_SEC3
P49257	LMAN1_HUMAN Protein ERGIC-53 OS=Homo sapiens GN=LMAN1 PE=1 SV=2	No	2	2	0.0796377
Q9UM54	MYO6_HUMAN Unconventional myosin-VI OS=Homo sapiens GN=MYO6 PE=1 SV=4	No	2	2	0.0819384
Q07954	LRP1_HUMAN Prolow-density lipoprotein receptor-related protein 1 OS=Homo sapiens GN=LRP1 PE=1 SV=2	Yes	3	3	0.0831798
P07954	FUMH_HUMAN Fumarate hydratase, mitochondrial OS=Homo sapiens GN=FH PE=1 SV=3	No	2	2	0.0873333
P45880	VDAC2_HUMAN Voltage-dependent anion-selective channel protein 2 OS=Homo sapiens GN=VDAC2 PE=1 SV=2	No	6	6	0.0877777
P06276	CHLE_HUMAN Cholinesterase OS=Homo sapiens GN=BCHE PE=1 SV=1	Yes	2	2	0.0879528
Q13085	ACACA_HUMAN Acetyl-CoA carboxylase 1 OS=Homo sapiens GN=ACACA PE=1 SV=2	No	10	9	0.0890753
P23526	SAHH_HUMAN Adenosylhomocysteinase OS=Homo sapiens GN=AHCY PE=1 SV=4	No	4	4	0.0908273
P46779	RL28_HUMAN 60S ribosomal protein L28 OS=Homo sapiens GN=RPL28 PE=1 SV=3	No	3	2	0.0923203
O14786	NRP1_HUMAN Neuropilin-1 OS=Homo sapiens GN=NRP1 PE=1 SV=3	Yes	2	2	0.0941023
O00567	NOP56_HUMAN Nucleolar protein 56 OS=Homo sapiens GN=NOP56 PE=1 SV=4	No	4	3	0.0941023
P30101	PDIA3_HUMAN Protein disulfide-isomerase A3 OS=Homo sapiens GN=PDIA3 PE=1 SV=4	No	5	5	0.0941023
P61626	LYSC_HUMAN Lysozyme C OS=Homo sapiens GN=LYZ PE=1 SV=1	No	3	3	0.0959793
P61619	S61A1_HUMAN Protein transport protein Sec61 subunit alpha isoform 1 OS=Homo sapiens GN=SEC61A1 PE=1 SV=2;sp	No	7	7	0.102056
P35609	ACTN2_HUMAN Alpha-actinin-2 OS=Homo sapiens GN=ACTN2 PE=1 SV=1	No	14	10	0.103105
P12883	MYH7_HUMAN Myosin-7 OS=Homo sapiens GN=MYH7 PE=1 SV=5	No	34	5	0.103865
P07900	HS90A_HUMAN Heat shock protein HSP 90-alpha OS=Homo sapiens GN=HSP90AA1 PE=1 SV=5	No	9	4	0.108538
Q9NTJ5	SAC1_HUMAN Phosphatidylinositide phosphatase SAC1 OS=Homo sapiens GN=SACM1L PE=1 SV=2	No	2	1	0.108538
Q15848	ADIPO_HUMAN Adiponectin OS=Homo sapiens GN=ADIPOQ PE=1 SV=1	Yes	2	2	0.109244
Q15392	DHC24_HUMAN Delta(24)-sterol reductase OS=Homo sapiens GN=DHCR24 PE=1 SV=2	No	2	2	0.109682
P0CF74	LAC6_HUMAN Ig lambda-6 chain C region OS=Homo sapiens GN=IGLC6 PE=4 SV=1	No	7	1	0.109791
P43251	BTD_HUMAN Biotinidase OS=Homo sapiens GN=BTD PE=1 SV=2	Yes	2	2	0.114839
Q00577	PURA_HUMAN Transcriptional activator protein Pur-alpha OS=Homo sapiens GN=PURA PE=1 SV=2	No	2	2	0.115395
P35625	TIMP3_HUMAN Metalloproteinase inhibitor 3 OS=Homo sapiens GN=TIMP3 PE=1 SV=2	No	2	2	0.115436
P02671	FIBA_HUMAN Fibrinogen alpha chain OS=Homo sapiens GN=FGA PE=1 SV=2	Yes	7	7	0.115888
Q9HCL2	GPAT1_HUMAN Glycerol-3-phosphate acyltransferase 1, mitochondrial OS=Homo sapiens GN=GPAM PE=1 SV=3	No	2	2	0.118026
P04434	KV310_HUMAN Ig kappa chain V-III region VH (Fragment) OS=Homo sapiens PE=4 SV=1;sp	No	2	1	0.118453
O60506	HNRPQ_HUMAN Heterogeneous nuclear ribonucleoprotein Q OS=Homo sapiens GN=SYNCRIP PE=1 SV=2	No	2	1	0.120847
Q8JPR2	L_BUNL8 RNA-directed RNA polymerase L OS=Bunyavirus La Crosse (isolate Human/United States/L78/1978) GN=L PE=3 SV=1	No	2	1	0.120848
P04220	MUCB_HUMAN Ig mu heavy chain disease protein OS=Homo sapiens PE=1 SV=1	No	31	3	0.121888
P61019	RAB2A_HUMAN Ras-related protein Rab-2A OS=Homo sapiens GN=RAB2A PE=1 SV=1;sp	No	4	4	0.122605
P83731	RL24_HUMAN 60S ribosomal protein L24 OS=Homo sapiens GN=RPL24 PE=1 SV=1	No	2	2	0.129596
P01603	KV111_HUMAN Ig kappa chain V-I region Ka OS=Homo sapiens PE=1 SV=1	No	3	2	0.138098
P01621	KV303_HUMAN Ig kappa chain V-III region NG9 (Fragment) OS=Homo sapiens PE=2 SV=1	No	3	1	0.140153
Q99878	H2A1J_HUMAN Histone H2A type 1-J OS=Homo sapiens GN=HIST1H2AJ PE=1 SV=3;sp	No	5	1	0.14492
P11177	ODPB_HUMAN Pyruvate dehydrogenase E1 component subunit beta, mitochondrial OS=Homo sapiens GN=PDHB PE=1 SV=3	No	3	3	0.147257
Q96A32	MLRS_HUMAN Myosin regulatory light chain 2, skeletal muscle isoform OS=Homo sapiens GN=MYLPF PE=2 SV=1	No	9	9	0.156586
P01701	LV151_HUMAN Ig lambda chain V-I region 51 OS=Homo sapiens GN=IGLV1-51 PE=1 SV=2;sp	No	3	3	0.158136
P09493	TPM1_HUMAN Tropomyosin alpha-1 chain OS=Homo sapiens GN=TPM1 PE=1 SV=2	No	15	5	0.158136
Q13813	SPTN1_HUMAN Spectrin alpha chain, non-erythrocytic 1 OS=Homo sapiens GN=SPTAN1 PE=1 SV=3	No	3	3	0.158136
P01772	HV311_HUMAN Ig heavy chain V-III region KOL OS=Homo sapiens PE=1 SV=1	No	4	2	0.187012
P26927	HGFL_HUMAN Hepatocyte growth factor-like protein OS=Homo sapiens GN=MST1 PE=1 SV=2;sp	Yes	2	2	0.188324
P02775	CXCL7_HUMAN Platelet basic protein OS=Homo sapiens GN=PPBP PE=1 SV=3	No	13	13	0.197276
Q7KZF4	SND1_HUMAN Staphylococcal nuclease domain-containing protein 1 OS=Homo sapiens GN=SND1 PE=1 SV=1	No	8	8	0.201343
O75636	FCN3_HUMAN Ficolin-3 OS=Homo sapiens GN=FCN3 PE=1 SV=2	Yes	8	8	0.209446
P01700	LV102_HUMAN Ig lambda chain V-I region HA OS=Homo sapiens PE=1 SV=1;sp	No	2	1	0.213928
P01880	IGHD_HUMAN Ig delta chain C region OS=Homo sapiens GN=IGHD PE=1 SV=2	Yes	6	6	0.223543
Q9P035	HACD3_HUMAN Very-long-chain (3R)-3-hydroxyacyl-CoA dehydratase 3 OS=Homo sapiens GN=HACD3 PE=1 SV=2	No	2	2	0.232004
Q9BWP8	COL11_HUMAN Collectin-11 OS=Homo sapiens GN=COLEC11 PE=1 SV=1	No	4	4	0.234419
P05164	PERM_HUMAN Myeloperoxidase OS=Homo sapiens GN=MPO PE=1 SV=1	Yes	2	2	0.244647
P21333	FLNA_HUMAN Filamin-A OS=Homo sapiens GN=FLNA PE=1 SV=4	No	2	2	0.247517
P23246	SFPQ_HUMAN Splicing factor, proline- and glutamine-rich OS=Homo sapiens GN=SFPQ PE=1 SV=2	No	2	2	0.250176
P20742	PZP_HUMAN Pregnancy zone protein OS=Homo sapiens GN=PZP PE=1 SV=4	Yes	18	11	0.260076
P01833	PIGR_HUMAN Polymeric immunoglobulin receptor OS=Homo sapiens GN=PIGR PE=1 SV=4	Yes	6	6	0.263639
P20929	NEBU_HUMAN Nebulin OS=Homo sapiens GN=NEB PE=1 SV=5	No	5	5	0.269498
P62899	RL31_HUMAN 60S ribosomal protein L31 OS=Homo sapiens GN=RPL31 PE=1 SV=1	No	4	4	0.291448
Q9Y6N5	SQRD_HUMAN Sulfide:quinone oxidoreductase, mitochondrial OS=Homo sapiens GN=SQRDL PE=1 SV=1	No	5	5	0.302936
P05160	F13B_HUMAN Coagulation factor XIII B chain OS=Homo sapiens GN=F13B PE=1 SV=3	Yes	4	4	0.331807
P68133	ACTS_HUMAN Actin, alpha skeletal muscle OS=Homo sapiens GN=ACTA1 PE=1 SV=1	No	24	2	0.337302
Q9UIJ7	KAD3_HUMAN GTP:AMP phosphotransferase AK3, mitochondrial OS=Homo sapiens GN=AK3 PE=1 SV=4	No	2	2	0.344496
O14561	ACPM_HUMAN Acyl carrier protein, mitochondrial OS=Homo sapiens GN=NDUFAB1 PE=1 SV=3	No	2	2	0.350521
P61026	RAB10_HUMAN Ras-related protein Rab-10 OS=Homo sapiens GN=RAB10 PE=1 SV=1	No	2	1	0.351937
P05109	S10A8_HUMAN Protein S100-A8 OS=Homo sapiens GN=S100A8 PE=1 SV=1	No	2	2	0.381422
P27105	STOM_HUMAN Erythrocyte band 7 integral membrane protein OS=Homo sapiens GN=STOM PE=1 SV=3	No	4	4	0.385205
Q16850	CP51A_HUMAN Lanosterol 14-alpha demethylase OS=Homo sapiens GN=CYP51A1 PE=1 SV=3	No	3	2	0.400779
Q9Y623	MYH4_HUMAN Myosin-4 OS=Homo sapiens GN=MYH4 PE=1 SV=2	No	56	13	0.432245
Q01469	FABP5_HUMAN Fatty acid-binding protein, epidermal OS=Homo sapiens GN=FABP5 PE=1 SV=3	No	2	2	0.45692
Q13576	IQGA2_HUMAN Ras GTPase-activating-like protein IQGAP2 OS=Homo sapiens GN=IQGAP2 PE=1 SV=4	No	6	6	0.472986
Q02413	DSG1_HUMAN Desmoglein-1 OS=Homo sapiens GN=DSG1 PE=1 SV=2	Yes	3	3	0.475385
Q9UGM5	FETUB_HUMAN Fetuin-B OS=Homo sapiens GN=FETUB PE=1 SV=2	Yes	3	3	0.493129
P01610	KV118_HUMAN Ig kappa chain V-I region WEA OS=Homo sapiens PE=1 SV=1;sp	No	3	2	0.511516
Q8WZ42	TITIN_HUMAN Titin OS=Homo sapiens GN=TTN PE=1 SV=4	No	43	43	0.517293
P23528	COF1_HUMAN Cofilin-1 OS=Homo sapiens GN=CFL1 PE=1 SV=3	No	4	4	0.526394
Q9UHG3	PCYOX_HUMAN Prenylcysteine oxidase 1 OS=Homo sapiens GN=PCYOX1 PE=1 SV=3	Yes	4	4	0.564632
P35580	MYH10_HUMAN Myosin-10 OS=Homo sapiens GN=MYH10 PE=1 SV=3	No	5	0	0.567218
P08514	ITA2B_HUMAN Integrin alpha-IIb OS=Homo sapiens GN=ITGA2B PE=1 SV=3	Yes	4	4	0.66849
P84077	ARF1_HUMAN ADP-ribosylation factor 1 OS=Homo sapiens GN=ARF1 PE=1 SV=2;sp	No	2	2	0.66849
P12882	MYH1_HUMAN Myosin-1 OS=Homo sapiens GN=MYH1 PE=1 SV=3	No	65	9	0.744019
P01699	LV101_HUMAN Ig lambda chain V-I region VOR OS=Homo sapiens PE=1 SV=1	No	2	1	0.818397
Q5TH69	BIG3_HUMAN Brefeldin A-inhibited guanine nucleotide-exchange protein 3 OS=Homo sapiens GN=ARFGEF3 PE=1 SV=3	No	2	2	0.94227
P01594	KV102_HUMAN Ig kappa chain V-I region AU OS=Homo sapiens PE=1 SV=1	No	2	1	0.991113
